# Supplementary material
Source: PubMed Central journal article supplement (PMC3867937)
Supplement: NIHMS536286-supplement-ESI.pdf [file NIHMS536286-supplement-ESI.pdf]

Electronic Supplementary Information for:

## Synthesis and antibacterial evaluation of anziaic acid and analogues as topoisomerase I inhibitors

Hao Lin,<sup>a</sup> Thirunavukkarasu Annamalai,<sup>b</sup> Priyanka Bansod,<sup>b</sup> Yuk-Ching Tse-Dinh<sup>b</sup> and Dianqing Sun,<sup>\*a</sup>

<sup>a</sup>Department of Pharmaceutical Sciences, The Daniel K. Inouye College of Pharmacy, University of Hawai'i at Hilo, 34 Rainbow Drive, Hilo, HI 96720, USA. Fax: 1-(808)-933-2974; Tel: 1-(808)-933-2960; E-mail: dianqing@hawaii.edu.

<sup>b</sup>Department of Chemistry & Biochemistry, Florida International University, 11200 SW 8<sup>th</sup> Street, Miami, FL 33199, USA.

### Table of Contents

|                                                                                                              |    |
|--------------------------------------------------------------------------------------------------------------|----|
| General.....                                                                                                 | 3  |
| Synthesis of 2,4-dihydroxy-6-pentylbenzaldehyde ( <b>2</b> ).....                                            | 3  |
| Synthesis of 2,4-bis(benzyloxy)-6-pentylbenzoic acid ( <b>3</b> ).....                                       | 4  |
| Synthesis of 2,4-dihydroxy-6-pentylbenzoic acid ( <b>4</b> ).....                                            | 4  |
| Synthesis of benzyl 2,4-dihydroxy-6-pentylbenzoate ( <b>5</b> ).....                                         | 5  |
| Synthesis of benzyl 4-((2,4-bis(benzyloxy)-6-pentylbenzoyl)oxy)-2-hydroxy-6-pentylbenzoate ( <b>6</b> )..... | 5  |
| Synthesis of Anziaic acid.....                                                                               | 6  |
| Synthesis of benzyl 2,4-dihydroxybenzoate ( <b>7</b> ).....                                                  | 6  |
| Synthesis of 2,4-bis(benzyloxy)benzaldehyde.....                                                             | 7  |
| Synthesis of 2,4-bis(benzyloxy)benzoic acid ( <b>9</b> ).....                                                | 7  |
| Synthesis of 7-hydroxy-2,2-dimethyl-5-pentyl-4H-benzo[d][1,3]dioxin-4-one ( <b>12</b> ).....                 | 7  |
| Synthesis of dimers <b>10a-d</b> and <b>13</b> .....                                                         | 8  |
| Synthesis of anziaic acid analogues <b>11a-d</b> and <b>14</b> .....                                         | 10 |
| <sup>1</sup> H NMR for compound <b>2</b> .....                                                               | 12 |
| HPLC for compound <b>2</b> .....                                                                             | 13 |
| <sup>1</sup> H and <sup>13</sup> C NMR for 2,4-bis(benzyloxy)-6-pentylbenzaldehyde.....                      | 14 |
| HPLC for 2,4-bis(benzyloxy)-6-pentylbenzaldehyde.....                                                        | 15 |
| <sup>1</sup> H and <sup>13</sup> C NMR for compound <b>3</b> .....                                           | 16 |
| HPLC for compound <b>3</b> .....                                                                             | 17 |
| <sup>1</sup> H and <sup>13</sup> C NMR for compound <b>4</b> .....                                           | 18 |
| HPLC for compound <b>4</b> .....                                                                             | 19 |
| <sup>1</sup> H and <sup>13</sup> C NMR for compound <b>5</b> .....                                           | 20 |

|                                                                                 |    |
|---------------------------------------------------------------------------------|----|
| HPLC for compound <b>5</b> .....                                                | 21 |
| <sup>1</sup> H and <sup>13</sup> C NMR for compound <b>6</b> .....              | 22 |
| HPLC for compound <b>6</b> .....                                                | 23 |
| <sup>1</sup> H and <sup>13</sup> C NMR for Anziaic acid .....                   | 24 |
| HPLC for Anziaic acid.....                                                      | 25 |
| <sup>1</sup> H and <sup>13</sup> C NMR for compound <b>7</b> .....              | 26 |
| HPLC for compound <b>7</b> .....                                                | 27 |
| <sup>1</sup> H and <sup>13</sup> C NMR for 2,4-bis(benzyloxy)benzaldehyde ..... | 28 |
| HPLC for 2,4-bis(benzyloxy)benzaldehyde .....                                   | 29 |
| <sup>1</sup> H and <sup>13</sup> C NMR for compound <b>9</b> .....              | 30 |
| HPLC for compound <b>9</b> .....                                                | 31 |
| <sup>1</sup> H NMR for compound <b>12</b> .....                                 | 32 |
| HPLC for compound <b>12</b> .....                                               | 33 |
| <sup>1</sup> H and <sup>13</sup> C NMR for compound <b>10a</b> .....            | 34 |
| HPLC for compound <b>10a</b> .....                                              | 35 |
| <sup>1</sup> H and <sup>13</sup> C NMR for compound <b>10b</b> .....            | 36 |
| HPLC for compound <b>10b</b> .....                                              | 37 |
| <sup>1</sup> H and <sup>13</sup> C NMR for compound <b>10c</b> .....            | 38 |
| HPLC for compound <b>10c</b> .....                                              | 39 |
| <sup>1</sup> H and <sup>13</sup> C NMR for compound <b>10d</b> .....            | 40 |
| HPLC for compound <b>10d</b> .....                                              | 41 |
| <sup>1</sup> H and <sup>13</sup> C NMR for compound <b>13</b> .....             | 42 |
| HPLC for compound <b>13</b> .....                                               | 43 |
| <sup>1</sup> H and <sup>13</sup> C NMR for compound <b>11a</b> .....            | 44 |
| HPLC for compound <b>11a</b> .....                                              | 45 |
| <sup>1</sup> H and <sup>13</sup> C NMR for compound <b>11b</b> .....            | 46 |
| HPLC for compound <b>11b</b> .....                                              | 47 |
| <sup>1</sup> H and <sup>13</sup> C NMR for compound <b>11c</b> .....            | 48 |
| HPLC for compound <b>11c</b> .....                                              | 49 |
| <sup>1</sup> H and <sup>13</sup> C NMR for compound <b>11d</b> .....            | 50 |
| HPLC for compound <b>11d</b> .....                                              | 51 |
| <sup>1</sup> H and <sup>13</sup> C NMR for compound <b>14</b> .....             | 52 |
| HPLC for compound <b>14</b> .....                                               | 53 |

## General

All reagents and solvents were obtained from Sigma-Aldrich (St. Louis, MO) and Fisher Scientific (Hanover Park, IL) and were used without further purification. Reactions were monitored either by thin-layer chromatography (TLC) or by a Shimadzu LC-20A series HPLC system. TLC was performed using glass plates pre-coated with silica gel (0.25 mm, 60-Å pore size, 230-400 mesh, Sorbent Technologies, GA) impregnated with a fluorescent indicator (254 nm). TLC plates were visualized by exposure to ultraviolet light (UV). Debenzylation reactions were done using domnick hunter NITROX UHP-60H hydrogen generator, USA. Flash column chromatography was performed using a Biotage Isolera One system and a Biotage SNAP cartridge. Proton and carbon nuclear magnetic resonance ( $^1\text{H}$  and  $^{13}\text{C}$  NMR) spectra were recorded employing a Bruker AM-400 spectrometer. Chemical shifts were expressed in parts per million (ppm),  $J$  values were in Hertz. Mass spectra were recorded on a Varian 500-MS IT mass spectrometer using ESI. High-resolution mass spectra (HRMS) were recorded with a BioTOF II ESI mass spectrometer. The purity of compounds was determined by analytical HPLC using a Gemini, 3 $\mu\text{m}$ , C18, 110Å column (50 mm  $\times$  4.6 mm, Phenomenex) and a flow rate of 1.0 mL/min. Gradient conditions: solvent A (0.1% trifluoroacetic acid in water) and solvent B (acetonitrile): 0-2.00 min 100% A, 2.00-7.00 min 0-100% B (linear gradient), 7.00-8.00 min 100% B, 8.00-9.00 min 0-100% A (linear gradient), 9.00-10.00 min 100% A, UV detection at 254 and 220 nm.

## Synthesis of 2,4-dihydroxy-6-pentylbenzaldehyde (**2**)

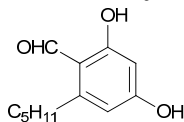

To a stirred solution of  $\text{POCl}_3$  (2.8 mL, 30 mmol) in dry DMF (8 mL) at 0 °C was slowly added a solution of olivetol (**1**) (2.18 g, 12 mmol) in dry DMF (6 mL). The mixture was allowed to stir at room temperature for 18 h. The reaction mixture was then cooled to 0 °C and cautiously treated with ice water (15 mL) and with 20% aqueous solution of NaOH to pH = 10. The resulting mixture was heated to reflux for 10 min and then allowed to cool to room temperature. The solution was then acidified to pH = 1 with concentrated hydrochloric acid, extracted with ethyl acetate (3  $\times$  25 mL). The combined organic layer was washed with brine (40 mL), dried over  $\text{Na}_2\text{SO}_4$ , filtered, and concentrated under reduced pressure. The residue was purified by flash column chromatography (Hexane : Ethyl Acetate = 90 : 10) to give **2** as a yellow solid (1.42 g, 56%).  $^1\text{H}$  NMR (400 MHz,  $\text{CDCl}_3$ , ppm)  $\delta$  12.44 (s, 1 H), 10.02 (s, 1 H), 7.27 (br, 1 H), 6.28 (d,  $J$  = 2.0 Hz, 1 H), 6.25 (d,  $J$  = 1.6 Hz, 1 H), 2.80 (t,  $J$  = 8.0 Hz, 3 H), 1.63-1.58 (m, 2 H), 1.36-1.31 (m, 4H), 0.89 (t,  $J$  = 6.4 Hz, 3 H); MS (ESI):  $m/z$  207.2[M-H] $^-$ ; HPLC purity: 84.1% (254 nm),  $t_R$ : 7.02 min; 95.4% (220 nm),  $t_R$ : 7.02 min.

## Synthesis of 2,4-bis(benzyloxy)-6-pentylbenzaldehyde

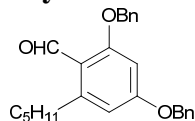

To a stirred solution of 2,4-dihydroxy-6-pentylbenzaldehyde **2** (1.423 g, 6.8 mmol) in acetone (20 mL) was added potassium carbonate (2.819 g, 20.4 mmol) and benzyl

bromide (2.43 mL, 20.4 mmol) at room temperature. The mixture was then heated to reflux for 12 h and allowed to cool to room temperature. The solvent was removed under reduced pressure. The residue was dissolved in water (40 mL), extracted with ethyl acetate (2 × 25 mL). The combined organic layer was dried over Na<sub>2</sub>SO<sub>4</sub>, filtered, and concentrated under reduced pressure. The residue was purified by flash column chromatography (Hexane : Ethyl Acetate = 97 : 3) to give an oil (1.861 g, 70%). <sup>1</sup>H NMR (400 MHz, CDCl<sub>3</sub>, ppm) δ 10.56 (s, 1 H), 7.40-7.33 (m, 10 H), 6.47 (d, *J* = 2.4 Hz, 1 H), 6.44 (d, *J* = 2.4 Hz, 1 H), 5.08 (s, 4 H), 2.96 (t, *J* = 7.6 Hz, 2 H), 1.55-1.53 (m, 2 H), 1.36-1.33 (m, 4 H), 0.89 (t, *J* = 7.2 Hz, 3 H); <sup>13</sup>C NMR (100.5 MHz, CDCl<sub>3</sub>, ppm) δ 190.31, 164.51, 163.53, 149.71, 136.15, 136.12, 128.77, 128.74, 128.36, 128.25, 127.61, 127.35, 117.36, 109.32, 97.86, 70.72, 70.20, 34.59, 31.96, 30.90, 22.64, 14.11; MS (ESI<sup>+</sup>): *m/z* 411.3 [M+Na]<sup>+</sup>; HPLC purity: 100% (254 nm), *t<sub>R</sub>*: 8.30 min; 100% (220 nm), *t<sub>R</sub>*: 8.30 min.

### Synthesis of 2,4-bis(benzyloxy)-6-pentylbenzoic acid (3)

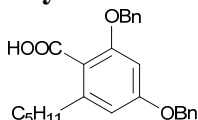

To a stirred solution of 2,4-bis(benzyloxy)-6-pentylbenzaldehyde (1.86 g, 4.8 mmol) and NaH<sub>2</sub>PO<sub>4</sub> (1.36 g, 12 mmol) in DMSO (16 mL) and water (4 mL) at 0 °C was slowly added a solution of NaClO<sub>2</sub> (1.44 g, 12 mmol) in water (4 mL). The mixture was allowed to stir at room temperature for 14 h. The saturated aqueous solution (20 mL) of Na<sub>2</sub>CO<sub>3</sub> was added. The mixture was then acidified to pH ≈ 1 with concentrated hydrochloric acid and extracted with ethyl acetate (2 × 25 mL). The combined organic layer was washed with brine (30 mL), dried over Na<sub>2</sub>SO<sub>4</sub>, filtered, and concentrated under reduced pressure. The residue was first purified by flash column chromatography (hexane : ethyl acetate = 80 : 20) to give a mixture of the desired product and trace amount of starting material. The mixture was then recrystallized in hexane/ethyl acetate (95 : 5) to give the pure product as a white solid (1.182 g, 61%). <sup>1</sup>H NMR (400 MHz, CDCl<sub>3</sub>, ppm) δ 7.41-7.29 (m, 10 H), 6.50 (d, *J* = 2.0 Hz, 1 H), 6.48 (d, *J* = 2.0 Hz, 1 H), 5.10 (s, 2 H), 5.04 (s, 2 H), 2.79 (t, *J* = 8.0 Hz, 2 H), 1.62-1.58 (m, 2 H), 1.33-1.29 (m, 4 H), 0.87 (t, *J* = 6.8 Hz, 3 H); <sup>13</sup>C NMR (100.5 MHz, CDCl<sub>3</sub>, ppm) δ 170.48, 161.09, 158.06, 146.58, 136.35, 135.94, 128.74, 128.73, 128.27, 128.23, 127.61, 127.28, 114.23, 108.82, 98.67, 71.25, 70.19, 34.68, 31.78, 31.07, 22.51, 14.06; MS (ESI): *m/z* 403.4 [M-H]<sup>-</sup> HPLC purity: 98.9% (254 nm), *t<sub>R</sub>*: 7.66 min; 99.3% (220 nm), *t<sub>R</sub>*: 7.66 min.

### Synthesis of 2,4-dihydroxy-6-pentylbenzoic acid (4)

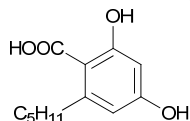

Method A: To a stirred solution of 2,4-dihydroxy-6-pentylbenzaldehyde **2** (833 mg, 4 mmol) and NaH<sub>2</sub>PO<sub>4</sub> (1.20 g, 10 mmol) in DMSO (10 mL) and water (2.5 mL) at 0 °C was slowly added a solution of NaClO<sub>2</sub> (1.13 g, 10 mmol) in water (2.5 mL). The mixture was allowed to stir at room temperature for 14 h. The saturated aqueous solution (15 mL) of Na<sub>2</sub>CO<sub>3</sub> was added. The mixture was then acidified to pH ≈ 1 with concentrated hydrochloric acid and extracted with ethyl acetate (2 × 25 mL). The combined organic

layer was washed with brine (30 mL), dried over Na<sub>2</sub>SO<sub>4</sub>, filtered, and concentrated under reduced pressure. The residue was purified by flash column chromatography (hexane : ethyl acetate = 70 : 30) to give the desired product (453 mg, 50%), which was used directly in the next step. HPLC purity: 96.5% (254 nm), *t*<sub>R</sub>: 6.50 min; 95.2% (220 nm), *t*<sub>R</sub>: 6.50 min.

Method B: A solution of 2,4-bis(benzyloxy)-6-pentylbenzoic acid **3** (402 mg, 1 mmol) in ethyl acetate (4 mL) was treated with 10 wt% Pd/C (49 mg, 12 wt%). The mixture was stirred at room temperature under 1 bar H<sub>2</sub> atmosphere for 24 h. The mixture was then filtered through Celite and washed with ethyl acetate (2 × 10 mL). The combined organic layer was evaporated under reduced pressure to give the desired product (216 mg, 97%). <sup>1</sup>H NMR (400 MHz, *d*<sub>6</sub>-DMSO, ppm) δ 10.08 (br, 1 H), 6.15 (d, *J* = 2.4 Hz, 1 H), 6.12 (d, *J* = 2.4 Hz, 1 H), 2.73 (t, *J* = 7.2 Hz, 2 H), 1.47-1.45 (m, 2 H), 1.26-1.24 (m, 4 H), 0.84 (t, 6.8 Hz, 3 H); <sup>13</sup>C NMR (100.5 MHz, *d*<sub>6</sub>-DMSO, ppm) δ 173.20, 164.04, 162.02, 147.69, 110.49, 105.71, 101.02, 35.74, 31.79, 31.46, 22.36, 14.34; MS (ESI): *m/z* 223.3 [M-H]<sup>-</sup>; HPLC purity: 100% (254 nm), *t*<sub>R</sub>: 6.50 min; 100% (220 nm), *t*<sub>R</sub>: 6.50 min.

### Synthesis of benzyl 2,4-dihydroxy-6-pentylbenzoate (**5**)

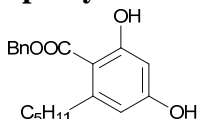

A suspension of 2,4-dihydroxy-6-pentylbenzoic acid **4** (192 mg, 0.86 mmol), BnBr (102 μL, 0.86 mmol) and potassium bicarbonate (103 mg, 1.03 mmol) in DMF (4 mL) was stirred at ambient temperature for 5 h. The mixture was then quenched with water (20 mL), extracted with ethyl acetate (2 × 25 mL). The combined organic layer was washed with H<sub>2</sub>O (20 mL) and brine (20 mL), then dried over Na<sub>2</sub>SO<sub>4</sub>, filtered, and concentrated under reduced pressure. The residue was purified by flash column chromatography (hexane : ethyl acetate = 85 : 15) to give **5** as a solid (247 mg, 92%). <sup>1</sup>H NMR (400 MHz, CDCl<sub>3</sub>, ppm) δ 11.82 (br, 1 H), 7.44-7.37 (m, 5 H), 6.28 (d, *J* = 2.4 Hz, 1 H), 6.20 (d, *J* = 2.4 Hz, 1 H), 5.77 (br, 1 H), 5.34 (s, 2 H), 2.75 (t, *J* = 8.0 Hz, 2 H), 1.39-1.37 (m, 2 H), 1.15-1.11 (m, 2 H), 1.04-1.02 (m, 2 H), 0.79 (t, *J* = 7.2 Hz, 3 H); <sup>13</sup>C NMR (100.5 MHz, CDCl<sub>3</sub>, ppm) δ 171.39, 165.39, 160.51, 149.19, 135.01, 129.06, 128.71, 110.88, 104.95, 101.40, 67.51, 36.98, 31.88, 31.82, 22.59, 14.03; MS (ESI<sup>+</sup>): *m/z* 337.2 [M+Na]<sup>+</sup>; HPLC purity: 99.7% (254 nm), *t*<sub>R</sub>: 7.55 min; 97.7% (220 nm), *t*<sub>R</sub>: 7.56 min.

### Synthesis of benzyl 4-((2,4-bis(benzyloxy)-6-pentylbenzoyl)oxy)-2-hydroxy-6-pentylbenzoate (**6**)

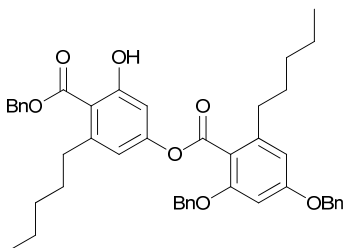

To a stirred solution of benzyl 2,4-dihydroxy-6-pentylbenzoate **5** (94.3 mg, 0.3 mmol) and 2,4-bis(benzyloxy)-6-pentylbenzoic acid **3** (121.4 mg, 0.3 mmol) in dry toluene (3

mL) was slowly added trifluoroacetic acid anhydride (486  $\mu$ L, 3.45 mmol) at room temperature. The mixture was stirred overnight and the solvent was then removed under reduced pressure. The residue was purified by flash column chromatography (hexane : ethyl acetate = 97 : 3) to give **6** as a solid (135 mg, 64%).  $^1\text{H}$  NMR (400 MHz,  $\text{CDCl}_3$ , ppm)  $\delta$  11.45 (s, 1 H), 7.44-7.23 (m, 15 H), 6.63 (d,  $J = 2.0$  Hz, 1 H), 6.50 (d, 2.4 Hz, 1 H), 6.48 (d,  $J = 2.0$  Hz, 1 H), 6.38 (d,  $J = 2.4$  Hz, 1 H), 5.36 (s, 2 H), 5.06 (s, 2 H), 5.05 (s, 2 H), 2.70-2.66 (m, 4 H), 1.66-1.62 (m, 2 H), 1.35-1.31 (m, 6 H), 1.14-1.10 (m, 2 H), 1.02-1.01 (m, 2 H), 0.88 (t,  $J = 7.2$  Hz, 3 H), 0.79 (t,  $J = 7.2$  Hz, 3 H);  $^{13}\text{C}$  NMR (100.5 MHz,  $\text{CDCl}_3$ , ppm)  $\delta$  171.09, 166.06, 164.41, 161.02, 157.66, 155.27, 148.32, 143.94, 136.49, 136.35, 134.79, 129.10, 128.83, 128.78, 128.71, 128.57, 128.22, 128.11, 127.59, 127.54, 116.13, 115.62, 109.56, 108.78, 107.46, 98.24, 70.70, 70.20, 67.81, 36.84, 33.95, 31.92, 31.86, 31.71, 31.06, 22.60, 22.57, 14.08, 14.04; MS (ESI $^-$ ):  $m/z$  699.6 [ $\text{M}-\text{H}$ ] $^-$ ; HRMS (ESI $^+$ ) Calcd for  $\text{C}_{45}\text{H}_{48}\text{O}_7$  ( $\text{M}^+$ ): 701.3473, Found: 701.3472; HPLC purity: 100% (254 nm),  $t_{\text{R}}$ : 8.91 min; 100% (220 nm),  $t_{\text{R}}$ : 8.91 min.

### Synthesis of anziaic acid

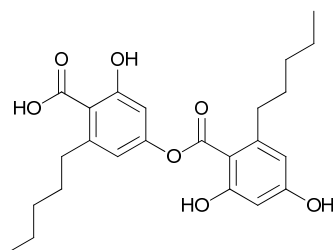

A solution of benzyl 4-((2,4-bis(benzyloxy)-6-pentylbenzoyl)oxy)-2-hydroxy-6-pentylbenzoate (**6**) (135 mg, 0.19 mmol) in ethyl acetate (5 mL) was treated with 10% Pd/C (38 mg). The mixture was stirred at room temperature under 1 bar of  $\text{H}_2$  atmosphere for ca. 2 h. The reaction was stopped once it was complete (monitored by HPLC). The mixture was filtered through Celite and washed with ethyl acetate. The combined organic layer was evaporated under reduced pressure (the water bath temperature was kept below 30  $^\circ\text{C}$ ) to give anziaic acid as a white solid (78.6 mg, 95%).  $^1\text{H}$  NMR (400 MHz,  $\text{CD}_3\text{OD}$ , ppm)  $\delta$  6.62 (d,  $J = 2.4$  Hz, 1 H), 6.56 (d,  $J = 2.0$  Hz, 1 H), 6.27 (d,  $J = 2.0$  Hz, 1 H), 6.22 (d,  $J = 2.4$  Hz, 1 H), 2.92 (t,  $J = 7.2$  Hz, 2 H), 2.86 (t,  $J = 7.6$  Hz, 2 H), 1.62-1.60 (m, 4 H), 1.34-1.32 (m, 8 H), 0.91-0.86 (m, 6 H);  $^{13}\text{C}$  NMR (100.5 MHz,  $\text{CD}_3\text{OD}$ , ppm)  $\delta$  173.89, 170.41, 166.05, 164.34, 164.14, 154.90, 149.36, 149.04, 116.22, 113.16, 112.23, 109.03, 105.22, 102.01, 37.73, 36.79, 33.21, 33.13, 32.99, 32.62, 23.60, 23.46, 14.44, 14.38; MS (ESI $^-$ ):  $m/z$  429.3 [ $\text{M}-\text{H}$ ] $^-$ ; HRMS (ESI $^+$ ) Calcd for  $\text{C}_{24}\text{H}_{30}\text{O}_7$  ( $\text{M}+\text{Na}^+$ ): 453.1884, Found: 453.1887; HPLC purity: 100% (254 nm),  $t_{\text{R}}$ : 7.54 min; 100% (220 nm),  $t_{\text{R}}$ : 7.54 min.

### Synthesis of benzyl 2,4-dihydroxybenzoate (7)

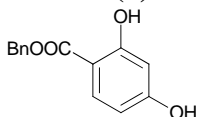

Following the procedure for compound **5**: 2,4-dihydroxybenzoic acid (1.54 g, 10 mmol), benzyl bromide (1.25 mL, 10.5 mmol), potassium bicarbonate (1.2 g, 12 mmol), DMF (20 mL); Eluent (hexane : ethyl acetate = 85 : 15); Product: white solid (2.02 g, 83%).  $^1\text{H}$  NMR (400 MHz,  $\text{CDCl}_3$ , ppm)  $\delta$  11.00 (br, 1 H), 7.77 (d,  $J = 8.4$  Hz, 1 H), 7.42-7.37 (m,

5 H), 6.40 (d,  $J = 2.4$  Hz, 1 H), 6.35 (dd,  $J = 8.4, 2.4$  Hz, 1 H), 5.62 (br, 1 H), 5.35 (s, 2 H);  $^{13}\text{C}$  NMR (100.5 MHz,  $\text{CDCl}_3$ , ppm)  $\delta$  169.79, 163.72, 162.07, 135.50, 132.10, 128.72, 128.52, 128.25, 107.96, 105.96, 103.19, 66.76; MS (ESI):  $m/z$  243.2[M-H] $^-$ ; HPLC purity: 100% (254 nm),  $t_R$ : 6.85 min; 97.1% (220 nm),  $t_R$ : 6.85 min.

### Synthesis of 2,4-bis(benzyloxy)benzaldehyde

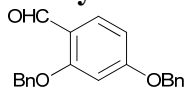

Following the procedure for compound 2,4-bis(benzyloxy)-6-pentylbenzaldehyde: 2,4-dihydroxybenzaldehyde (2.76 g, 20 mmol), benzyl bromide (5 mL, 42 mmol), potassium carbonate (6.08 g, 44 mmol), acetone (20 mL); Eluent (hexane : ethyl acetate = 95 : 5); Product: solid (6.12 g, 96%).  $^1\text{H}$  NMR (400 MHz,  $\text{CDCl}_3$ , ppm)  $\delta$  10.38 (s, 1 H), 7.83 (d,  $J = 8.8$  Hz, 1 H), 7.43-7.35 (m, 10 H), 6.63 (dd,  $J = 8.8, 1.6$  Hz, 1 H), 6.59 (d,  $J = 2.0$  Hz, 1 H), 5.12 (s, 2 H), 5.09 (s, 2 H);  $^{13}\text{C}$  NMR (100.5 MHz,  $\text{CDCl}_3$ , ppm)  $\delta$  188.29, 165.22, 162.80, 135.98, 135.95, 130.54, 128.79, 128.78, 128.42, 128.34, 127.58, 127.32, 119.56, 107.07, 100.15, 70.50, 70.43; MS (ESI):  $m/z$  317.2 [M-H] $^-$ ; HPLC purity: 98.7% (254 nm),  $t_R$ : 7.65 min; 98.7% (220 nm),  $t_R$ : 7.65 min.

### Synthesis of 2,4-bis(benzyloxy)benzoic acid (9)

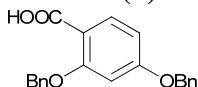

Following the procedure for compound 3: 2,4-bis(benzyloxy)benzaldehyde (824 mg, 2.6 mmol),  $\text{NaClO}_2$  (80%, 880 mg, 7.8 mmol),  $\text{NaH}_2\text{PO}_4$  (936 mg, 7.8 mmol), DMSO/ $\text{H}_2\text{O}$  (10 mL/4 mL); Eluent (hexane : ethyl acetate = 85 : 15); Product: solid (663 mg, 76%, containing trace amounts of starting material), pure product can be obtained following recrystallization in hexane/ethyl acetate (3:1).  $^1\text{H}$  NMR (400 MHz,  $d_6$ -DMSO, ppm)  $\delta$  7.72 (d,  $J = 8.4$  Hz, 1 H), 7.51-7.30 (m, 10 H), 6.80 (d,  $J = 2.0$  Hz, 1 H), 6.67 (dd,  $J = 8.8, 2.0$  Hz, 1 H), 5.19 (s, 2 H), 5.15 (s, 2 H);  $^{13}\text{C}$  NMR (100.5 MHz,  $d_6$ -DMSO, ppm)  $\delta$  167.03, 163.01, 159.86, 137.40, 136.95, 133.69, 128.98, 128.83, 128.52, 128.35, 128.11, 127.51, 114.01, 106.79, 101.64, 70.12, 70.05; MS (ESI):  $m/z$  333.3 [M-H] $^-$ ; HPLC purity: 100% (254 nm),  $t_R$ : 7.17 min; 100% (220 nm),  $t_R$ : 7.16 min.

### Synthesis of 7-hydroxy-2,2-dimethyl-5-pentyl-4H-benzo[d][1,3]dioxin-4-one (12)

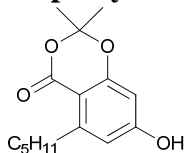

To a stirred solution of 2,4-dihydroxy-6-pentylbenzoic acid **4** (340 mg, 2 mmol), DMAP (14.9 mg, 0.12 mmol) and acetone (176  $\mu\text{L}$ , 2.4 mmol) in DME (5 mL) was added thionyl chloride (190  $\mu\text{L}$ , 2.6 mmol) at 0  $^\circ\text{C}$ . The mixture was allowed to warm to room temperature for 2 h. The mixture was then quenched with  $\text{NaHCO}_3$  (aq, 30 mL) and extracted with ethyl acetate (2  $\times$  30 mL). The combined organic layer was washed with brine (40 mL), dried over  $\text{Na}_2\text{SO}_4$ , filtered, and concentrated under reduced pressure. The residue was purified by flash column chromatography (hexane : ethyl acetate = 80 : 20) to give **12** as a solid (164 mg, 39%).  $^1\text{H}$  NMR (400 MHz,  $\text{CDCl}_3$ , ppm)  $\delta$  8.35 (s, 1 H),

6.52 (d,  $J = 2.4$  Hz, 1 H), 6.37 (d,  $J = 2.4$  Hz, 1 H), 3.02 (t,  $J = 8.0$  Hz, 2 H), 1.69 (s, 6 H), 1.63-1.56 (m, 2 H), 1.38-1.34 (m, 4 H), 0.87 (t,  $J = 7.2$  Hz, 3 H); HPLC purity: 89.7% (254 nm),  $t_R$ : 7.05 min; 90.2% (220 nm),  $t_R$ : 7.05 min.

### Synthesis of dimeric precursors 10a-d and 13

#### benzyl 4-((2,4-bis(benzyloxy)benzoyl)oxy)-2-hydroxy-6-pentylbenzoate (10a)

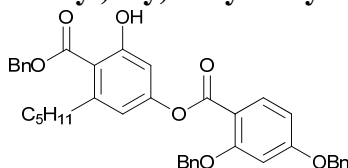

Following the procedure for compound **6**: compound **5** (62.9 mg, 0.2 mmol), compound **9** (70.2 mg, 0.21 mmol), trifluoroacetic acid anhydride (324  $\mu$ L, 2.3 mmol), toluene (2 mL); Eluent (hexane : ethyl acetate = 97 : 3), then recrystallization from hexane if necessary; Product: white solid (79 mg, 62%).  $^1\text{H}$  NMR (400 MHz,  $\text{CDCl}_3$ , ppm)  $\delta$  11.48 (s, 1 H), 8.02 (d,  $J = 8.8$  Hz, 1 H), 7.47-7.26 (m, 15 H), 6.73 (d,  $J = 2.4$  Hz, 1 H), 6.65 (d,  $J = 2.0$  Hz, 1 H), 6.61 (dd,  $J = 8.8, 2.0$  Hz, 1 H), 6.54 (d,  $J = 2.0$  Hz, 1 H), 5.36 (s, 2 H), 5.13 (s, 2 H), 5.08 (s, 2 H), 2.78 (t,  $J = 8.0$  Hz, 2 H), 1.43-1.39 (m, 2 H), 1.14-1.13 (m, 2 H), 1.04-1.03 (m, 2 H), 0.79 (t,  $J = 7.2$  Hz, 3 H);  $^{13}\text{C}$  NMR (100.5 MHz,  $\text{CDCl}_3$ , ppm)  $\delta$  171.15, 164.45, 164.14, 162.96, 161.14, 155.58, 148.18, 136.35, 136.08, 134.87, 134.71, 129.12, 128.82, 128.79, 128.61, 128.38, 127.90, 127.60, 126.96, 116.34, 111.73, 109.29, 108.93, 106.30, 101.34, 70.62, 70.36, 67.79, 36.90, 31.95, 31.90, 22.62, 14.08; MS ( $\text{ESI}^+$ ):  $m/z$  631.2 [ $\text{M}+\text{H}$ ] $^+$ ; HRMS ( $\text{ESI}^+$ ) Calcd for  $\text{C}_{40}\text{H}_{38}\text{O}_7$  ( $\text{M}+\text{H}^+$ ): 631.2691, Found: 631.2688; HPLC purity: 100% (254 nm),  $t_R$ : 8.56 min; 100% (220 nm),  $t_R$ : 8.56 min.

#### 4-((benzyloxy)carbonyl)-3-hydroxyphenyl 2,4-bis(benzyloxy)-6-pentylbenzoate (10b)

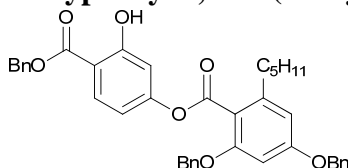

Following the procedure for compound **6**: compound **7** (48.4 mg, 0.2 mmol), compound **3** (84.4 mg, 0.21 mmol), trifluoroacetic acid anhydride (324  $\mu$ L, 2.3 mmol), toluene (2 mL); Eluent (hexane : ethyl acetate = 97 : 3), then recrystallization from hexane if necessary; Product: white solid (107 mg, 85%).  $^1\text{H}$  NMR (400 MHz,  $\text{CDCl}_3$ , ppm)  $\delta$  10.88 (s, 1 H), 7.84 (d,  $J = 8.4$  Hz, 1 H), 7.42-7.31 (m, 15 H), 6.75 (d,  $J = 2.0$  Hz, 1 H), 6.61 (dd,  $J = 8.8, 2.0$  Hz, 1 H), 6.49 (s, 1 H), 6.48 (s, 1 H), 5.36 (s, 2 H), 5.05 (s, 2 H), 5.04 (s, 2 H), 2.68 (t,  $J = 7.6$  Hz, 2 H), 1.66-1.64 (m, 2 H), 1.32-1.31 (m, 4 H), 0.88 (t,  $J = 7.2$  Hz, 3 H);  $^{13}\text{C}$  NMR (100.5 MHz,  $\text{CDCl}_3$ , ppm)  $\delta$  169.55, 166.06, 163.15, 161.15, 157.76, 156.89, 144.03, 136.53, 136.37, 135.36, 131.24, 128.79, 128.74, 128.65, 128.30, 128.25, 128.19, 127.61, 127.49, 115.51, 113.44, 110.82, 110.24, 107.57, 98.32, 70.73, 70.23, 67.06, 33.99, 31.73, 31.08, 22.60, 14.09; MS ( $\text{ESI}^+$ ):  $m/z$  653.0 [ $\text{M}+\text{Na}$ ] $^+$ ; HRMS ( $\text{ESI}^+$ ) Calcd for  $\text{C}_{40}\text{H}_{38}\text{O}_7$  ( $\text{M}+\text{H}^+$ ): 631.2691, Found: 631.2691; HPLC purity: 100% (254 nm),  $t_R$ : 8.63 min; 100% (220 nm),  $t_R$ : 8.63 min.

#### benzyl 4-((2,4-bis(benzyloxy)benzoyl)oxy)-2-hydroxybenzoate (10c)



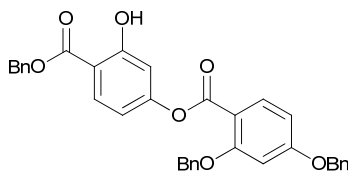

Following the procedure for compound **6**: compound **7** (70.5 mg, 0.29 mmol), compound **9** (96.8 mg, 0.29 mmol), trifluoroacetic acid anhydride (410  $\mu$ L, 2.9 mmol), toluene (3 mL); Eluent (hexane : ethyl acetate = 97 : 3), then recrystallization from hexane if necessary; Product: white solid (105 mg, 65%).  $^1\text{H}$  NMR (400 MHz,  $\text{CDCl}_3$ , ppm)  $\delta$  10.89 (s, 1 H), 8.04 (d,  $J$  = 8.8 Hz, 1 H), 7.90 (d,  $J$  = 8.8 Hz, 1 H), 7.49-7.28 (m, 15 H), 6.84 (s, 1 H), 6.73 (d,  $J$  = 8.8 Hz, 1 H), 6.65 (s, 1 H), 6.63 (d,  $J$  = 9.2 Hz, 1 H), 5.38 (s, 2 H), 5.15 (s, 2 H), 5.10 (s, 2 H);  $^{13}\text{C}$  NMR (100.5 MHz,  $\text{CDCl}_3$ , ppm)  $\delta$  169.60, 164.21, 163.08, 162.89, 161.21, 157.07, 136.29, 136.02, 135.33, 134.75, 131.13, 128.80, 128.78, 128.63, 128.42, 128.32, 127.93, 127.62, 126.90, 113.69, 111.48, 110.94, 109.96, 106.27, 101.31, 70.58, 70.38, 67.04; MS (ESI $^-$ ):  $m/z$  559.4  $[\text{M}-\text{H}]^-$ ; HPLC purity: 100% (254 nm),  $t_R$ : 8.27 min; 100% (220 nm),  $t_R$ : 8.27 min.

### 3-hydroxy-5-pentylphenyl 2,4-bis(benzyloxy)-6-pentylbenzoate (**10d**)

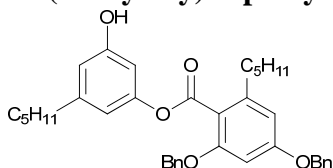

Following the procedure for compound **6**: compound **8** (olivetol **1**) (43 mg, 0.24 mmol), compound **3** (81 mg, 0.2 mmol), trifluoroacetic acid anhydride (324  $\mu$ L, 2.3 mmol), toluene (2 mL); Eluent (hexane : ethyl acetate = 97 : 3); Product: solid (65 mg, 57%).  $^1\text{H}$  NMR (400 MHz,  $\text{CDCl}_3$ , ppm)  $\delta$  7.43-7.31 (m, 10 H), 6.50-6.47 (m, 3 H), 6.42 (s, 1 H), 6.25 (s, 1 H), 5.11 (br, 1 H), 5.06 (s, 2 H), 5.05 (s, 2 H), 2.69 (t,  $J$  = 7.6 Hz, 2 H), 2.45 (t,  $J$  = 7.6 Hz, 2 H), 1.65-1.64 (m, 2 H), 1.54-1.50 (m, 2 H), 1.33-1.28 (m, 8 H), 0.89-0.88 (m, 6 H);  $^{13}\text{C}$  NMR (100.5 MHz,  $\text{CDCl}_3$ , ppm)  $\delta$  167.20, 160.88, 157.60, 156.26, 151.68, 145.74, 143.68, 136.54, 128.71, 128.60, 128.20, 128.06, 127.96, 127.60, 116.14, 113.95, 113.12, 107.43, 106.57, 98.22, 70.75, 70.21, 35.75, 33.93, 31.71, 31.51, 31.01, 30.67, 22.58, 22.53, 14.05; MS (ESI $^+$ ):  $m/z$  589.3  $[\text{M}+\text{Na}]^+$ ; HRMS (ESI $^+$ ) Calcd for  $\text{C}_{37}\text{H}_{42}\text{O}_5$  ( $\text{M}+\text{H}^+$ ): 567.3105, Found: 567.3107; HPLC purity: 98.8% (254 nm),  $t_R$ : 8.44 min; 98.7% (220 nm),  $t_R$ : 8.44 min.

### 2,2-dimethyl-4-oxo-5-pentyl-4H-benzo[d][1,3]dioxin-7-yl 2,4-bis(benzyloxy)-6-pentyl benzoate (**13**)

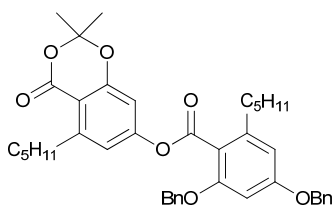

Following the procedure for compound **6**: compound **12** (38 mg, 0.14 mmol), compound **3** (61.7 mg, 0.15 mmol), trifluoroacetic acid anhydride (233  $\mu$ L, 1.65 mmol), toluene (2 mL); Eluent (hexane : ethyl acetate = 97 : 3); Product: solid (80 mg, 85%).  $^1\text{H}$  NMR (400 MHz,  $\text{CDCl}_3$ , ppm)  $\delta$  7.41-7.32 (m, 10 H), 6.60 (s, 1 H), 6.59 (s, 1 H), 6.52 (s, 1 H), 6.50

(s, 1 H), 5.07 (s, 2 H), 5.06 (s, 2 H), 3.00 (t,  $J = 7.6$  Hz, 2 H), 2.69 (t,  $J = 7.6$  Hz, 2 H), 1.69 (s, 6 H), 1.65-1.61 (m, 2 H), 1.53-1.51 (m, 2 H), 1.34-1.33 (m, 8 H), 0.90-0.88 (m, 6 H);  $^{13}\text{C}$  NMR (100.5 MHz,  $\text{CDCl}_3$ , ppm)  $\delta$  165.90, 161.21, 159.71, 158.16, 157.84, 155.93, 150.46, 144.08, 136.44, 136.28, 128.72, 128.59, 128.24, 128.19, 127.65, 127.57, 118.42, 115.27, 109.51, 108.59, 107.57, 105.20, 98.26, 70.79, 70.23, 34.46, 33.93, 31.86, 31.68, 31.06, 30.61, 25.70, 22.56, 22.52, 14.07, 14.03; MS (ESI<sup>+</sup>):  $m/z$  673.4 [ $\text{M}+\text{Na}$ ]<sup>+</sup>; HRMS (ESI<sup>+</sup>) Calcd for  $\text{C}_{41}\text{H}_{46}\text{O}_7$  ( $\text{M}+\text{H}$ )<sup>+</sup>: 651.3317, Found: 651.3318; HPLC purity: 97.7% (254 nm),  $t_R$ : 8.79 min; 97.2% (220 nm),  $t_R$ : 8.79 min.

### Synthesis of anziaic acid analogues 11a-d and 14

#### 4-((2,4-dihydroxybenzoyl)oxy)-2-hydroxy-6-pentylbenzoic acid (11a)

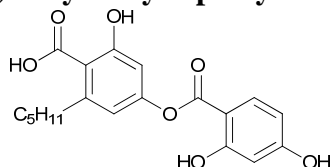

Following the procedure for anziaic acid: Compound **10a** (79 mg, 0.12 mmol), 10 wt% Pd/C (25 mg, 31 wt%), ethyl acetate (4 mL); Product: solid (45 mg, 100%).  $^1\text{H}$  NMR (400 MHz,  $\text{CD}_3\text{OD}$ , ppm)  $\delta$  7.87 (d,  $J = 8.8$  Hz, 1 H), 6.65 (d,  $J = 2.4$  Hz, 1 H), 6.60 (d,  $J = 2.0$  Hz, 1 H), 6.42 (dd,  $J = 8.8, 2.4$  Hz, 1 H), 6.35 (d,  $J = 2.4$  Hz, 1 H), 2.92 (t,  $J = 7.2$  Hz, 2 H), 1.62-1.61 (m, 2 H), 1.37-1.35 (m, 4 H), 0.91 (t,  $J = 7.2$  Hz, 3 H);  $^{13}\text{C}$  NMR (100.5 MHz,  $\text{CD}_3\text{OD}$ , ppm)  $\delta$  167.89, 165.25, 164.29, 162.61, 153.72, 147.55, 131.94, 114.96, 111.90, 108.30, 107.69, 103.39, 102.29, 35.39, 31.66, 31.29, 22.09, 12.98; MS (ESI<sup>-</sup>):  $m/z$  359.1 [ $\text{M}-\text{H}$ ]<sup>-</sup>; HPLC purity: 100% (254 nm),  $t_R$ : 6.96 min; 100% (220 nm),  $t_R$ : 6.96 min.

#### 4-((2,4-dihydroxy-6-pentylbenzoyl)oxy)-2-hydroxybenzoic acid (11b)

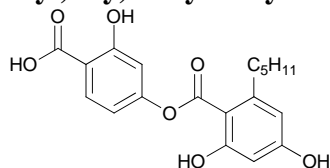

Following the procedure for anziaic acid: Compound **10b** (97 mg, 0.15 mmol), 10 wt% Pd/C (32 mg, 33 wt%), ethyl acetate (5 mL); Product: solid (55 mg, 100%).  $^1\text{H}$  NMR (400 MHz,  $\text{CDCl}_3$ , ppm)  $\delta$  7.95 (d,  $J = 8.4$  Hz, 1 H), 6.78-6.75 (m, 2 H), 6.29 (d,  $J = 2.4$  Hz, 1 H), 6.23 (d,  $J = 2.4$  Hz, 1 H), 2.88 (t,  $J = 7.6$  Hz, 2 H), 1.65-1.64 (m, 2 H), 1.34-1.32 (m, 4 H), 0.87 (t,  $J = 6.8$  Hz, 3 H);  $^{13}\text{C}$  NMR (100.5 MHz,  $\text{CDCl}_3$ , ppm)  $\delta$  171.61, 168.87, 164.42, 163.06, 162.96, 155.65, 147.84, 131.46, 112.68, 110.77, 110.74, 109.94, 104.09, 100.59, 36.15, 31.74, 31.63, 22.17, 12.97; MS (ESI<sup>-</sup>):  $m/z$  359.1 [ $\text{M}-\text{H}$ ]<sup>-</sup>; HRMS (ESI<sup>+</sup>) Calcd for  $\text{C}_{19}\text{H}_{20}\text{O}_7$  ( $\text{M}+\text{H}$ )<sup>+</sup>: 361.1282, Found: 361.1280; HPLC purity: 98.0% (254 nm),  $t_R$ : 6.91 min; 98.3% (220 nm),  $t_R$ : 6.91 min.

#### 4-((2,4-dihydroxybenzoyl)oxy)-2-hydroxybenzoic acid (11c)

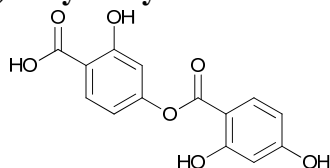

Following the procedure for anziaic acid: Compound **10c** (54 mg, 0.1 mmol), 10 wt% Pd/C (20 mg, 37 wt%), ethyl acetate (4 mL); Product: solid (27.9 mg, 99%). <sup>1</sup>H NMR (400 MHz, CD<sub>3</sub>OD, ppm) δ 7.92 (d, *J* = 8.4 Hz, 1 H), 7.87 (d, *J* = 8.8 Hz, 1 H), 6.81 (d, *J* = 2.4 Hz, 1 H), 6.77 (dd, *J* = 8.8, 2.4 Hz, 1 H), 6.43 (dd, *J* = 8.8, 2.4 Hz, 1 H), 6.35 (d, *J* = 2.4 Hz, 1 H); <sup>13</sup>C NMR (100.5 MHz, CD<sub>3</sub>OD, ppm) δ 171.62, 167.76, 165.33, 164.31, 162.99, 155.80, 131.96, 131.37, 112.72, 110.03, 108.35, 103.28, 102.31; MS (ESI<sup>-</sup>): *m/z* 289.1 [M-H]<sup>-</sup>; HRMS (ESI<sup>+</sup>) Calcd for C<sub>14</sub>H<sub>10</sub>O<sub>7</sub> (M+H<sup>+</sup>): 291.0500, Found: 291.0503; HPLC purity: 100% (254 nm), *t<sub>R</sub>*: 6.29 min; 100% (220 nm), *t<sub>R</sub>*: 6.29 min.

### 3-hydroxy-5-pentylphenyl 2,4-dihydroxy-6-pentylbenzoate (**11d**)

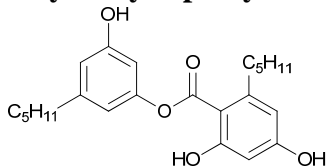

Following the procedure for anziaic acid: Compound **10d** (60 mg, 0.105 mmol), 10 wt% Pd/C (21 mg, 35 wt%), ethyl acetate (4 mL); Product: solid (33 mg, 80%). <sup>1</sup>H NMR (400 MHz, CDCl<sub>3</sub>, ppm) δ 11.50 (br, 1 H), 6.59 (s, 1 H), 6.56 (s, 1 H), 6.49 (s, 1 H), 6.30 (s, 2 H), 5.94 (br, 2 H), 2.93 (t, *J* = 7.2 Hz, 2 H), 2.55 (t, *J* = 7.6 Hz, 2 H), 1.63-1.58 (m, 4 H), 1.31-1.30 (m, 8 H), 0.90-0.83 (m, 6 H); <sup>13</sup>C NMR (100.5 MHz, CDCl<sub>3</sub>, ppm) δ 170.45, 165.75, 161.31, 156.37, 150.51, 149.55, 146.24, 113.83, 113.70, 111.55, 106.59, 104.23, 101.60, 37.11, 35.74, 32.00, 31.84, 31.43, 30.60, 22.56, 22.48, 14.01, 13.98; MS (ESI<sup>-</sup>): *m/z* 385.3 [M-H]<sup>-</sup>; HRMS (ESI<sup>+</sup>) Calcd for C<sub>23</sub>H<sub>30</sub>O<sub>5</sub> (M+H<sup>+</sup>): 387.2166, Found: 387.2182; HPLC purity: 98.9% (254 nm), *t<sub>R</sub>*: 7.69 min; 98.5% (220 nm), *t<sub>R</sub>*: 7.69 min.

### 2,2-dimethyl-4-oxo-5-pentyl-4H-benzo[d][1,3]dioxin-7-yl 2,4-dihydroxy-6-pentyl benzoate (**14**)

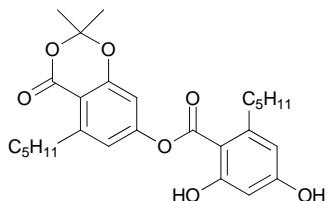

Following the procedure for anziaic acid: Compound **13** (80 mg, 0.12 mmol), 10 wt% Pd/C (26 mg, 33 wt%), ethyl acetate (4.5 mL); Eluent: hexane : ethyl acetate = 90 : 10; Product: solid (48 mg, 83%). <sup>1</sup>H NMR (400 MHz, CDCl<sub>3</sub>, ppm) δ 11.22 (s, 1 H), 6.77 (d, *J* = 1.6 Hz, 1 H), 6.71 (d, *J* = 2.0 Hz, 1 H), 6.35 (s, 1 H), 6.34 (s, 1 H), 5.94 (br, 1 H), 3.12 (t, *J* = 7.2 Hz, 2 H), 2.95 (t, *J* = 7.6 Hz, 2 H), 1.74 (s, 6 H), 1.67-1.63 (m, 4 H), 1.37-1.33 (m, 8 H), 0.91-0.87 (m, 6 H); <sup>13</sup>C NMR (100.5 MHz, CDCl<sub>3</sub>, ppm) δ 169.23, 166.39, 161.63, 159.77, 158.30, 154.69, 150.83, 149.33, 118.25, 111.58, 109.91, 108.62, 105.50, 103.78, 101.74, 37.19, 34.51, 32.01, 31.87, 31.80, 30.55, 25.68, 22.57, 22.48, 14.01; MS (ESI<sup>-</sup>): *m/z* 468.9 [M-H]<sup>-</sup>; HRMS (ESI<sup>+</sup>) Calcd for C<sub>27</sub>H<sub>34</sub>O<sub>7</sub> (M+Na<sup>+</sup>): 493.2197, Found: 493.2195; HPLC purity: 95.9% (254 nm), *t<sub>R</sub>*: 8.11 min; 95.7% (220 nm), *t<sub>R</sub>*: 8.11 min.

# <sup>1</sup>H NMR for compound 2

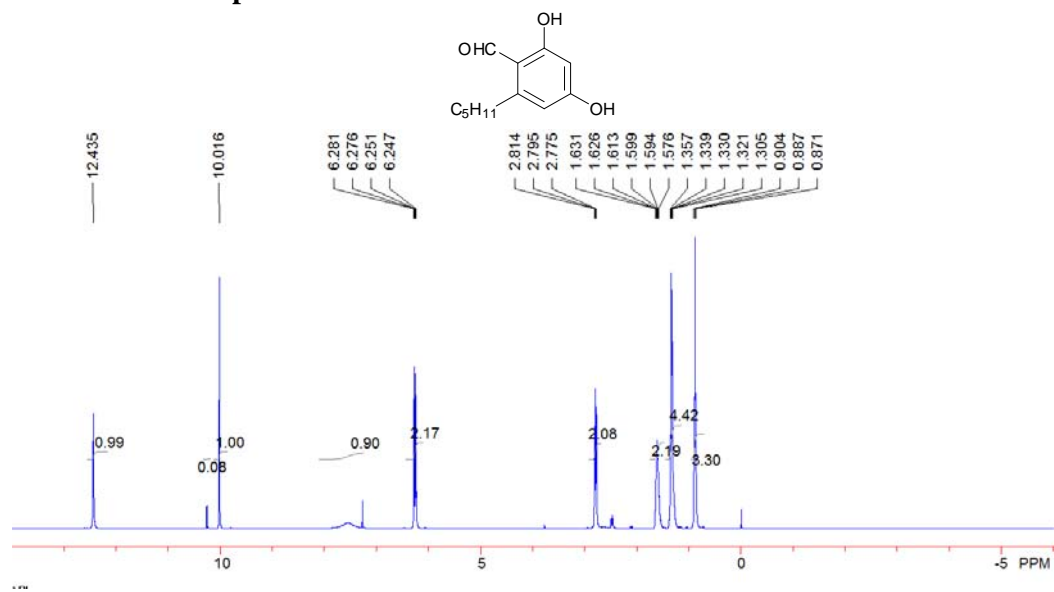

## HPLC for compound 2

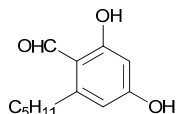

11/6/2012 09:29:06 1 / 1

### ==== Shimadzu LCsolution Analysis Report ====

Sample Name : HL1-5-1  
 Tray# : 1  
 Vial # : 61  
 Injection Volume : 5 uL  
 Data File Name : HL1-5-1.lcd  
 Method File Name : SDQ gradient.lcm  
 Batch File Name :  
 Data Acquired : 11/6/2012 8:40:11 AM

#### <Chromatogram>

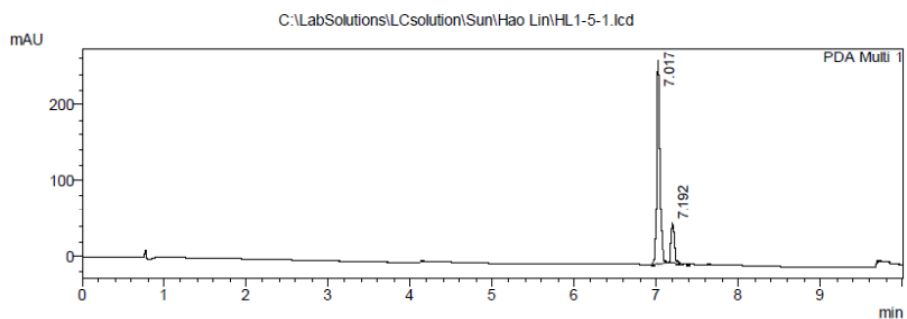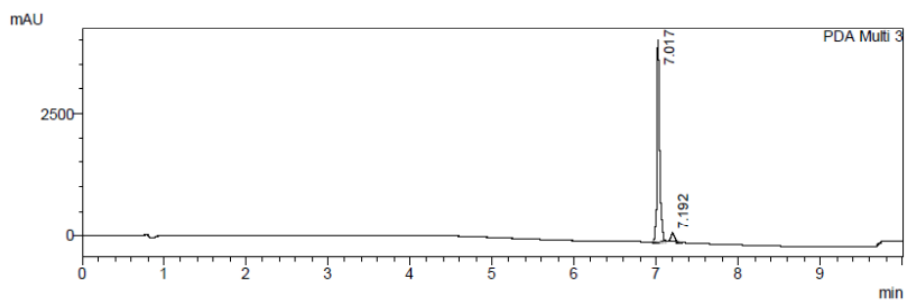

- 1 PDA Multi 1/254nm 4nm
- 2 PDA Multi 3/220nm 4nm

PeakTable

PDA Ch1 254nm 4nm

| Peak# | Ret. Time | Area   | Height | Area %  | Height % |
|-------|-----------|--------|--------|---------|----------|
| 1     | 7.017     | 760014 | 261683 | 84.078  | 83.840   |
| 2     | 7.192     | 143929 | 50439  | 15.922  | 16.160   |
| Total |           | 903943 | 312122 | 100.000 | 100.000  |

PeakTable

PDA Ch3 220nm 4nm

| Peak# | Ret. Time | Area     | Height  | Area %  | Height % |
|-------|-----------|----------|---------|---------|----------|
| 1     | 7.017     | 10187082 | 4120718 | 95.443  | 95.844   |
| 2     | 7.192     | 486362   | 178673  | 4.557   | 4.156    |
| Total |           | 10673444 | 4299391 | 100.000 | 100.000  |

C:\LabSolutions\LCsolution\Sun\Hao Lin\HL1-5-1.lcd

# $^1\text{H}$ and $^{13}\text{C}$ NMR for 2,4-bis(benzyloxy)-6-pentylbenzaldehyde

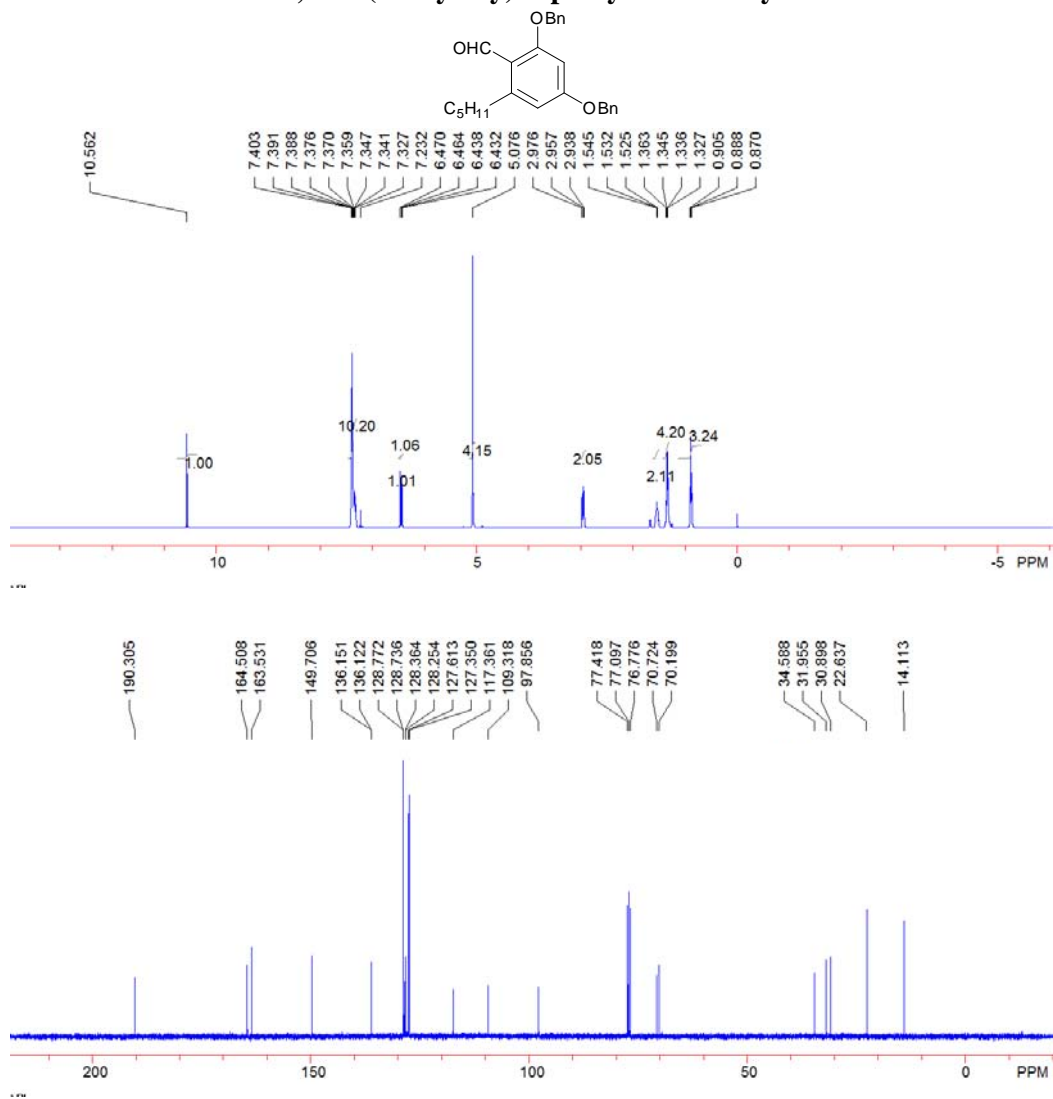

# HPLC for 2,4-bis(benzyloxy)-6-pentylbenzaldehyde

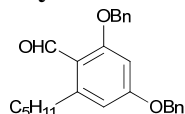

11/6/2012 09:31:32 1 / 1

## ==== Shimadzu LCsolution Analysis Report ====

Sample Name : HL1-9-1  
 Tray# : 1  
 Vial# : 61  
 Injection Volume : 5 uL  
 Data File Name : HL1-9-1.lcd  
 Method File Name : SDQ gradient.lcm  
 Batch File Name :  
 Data Acquired : 11/6/2012 9:01:45 AM

### <Chromatogram>

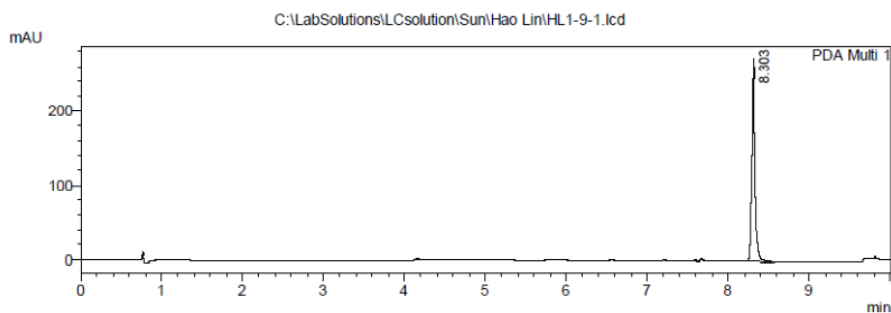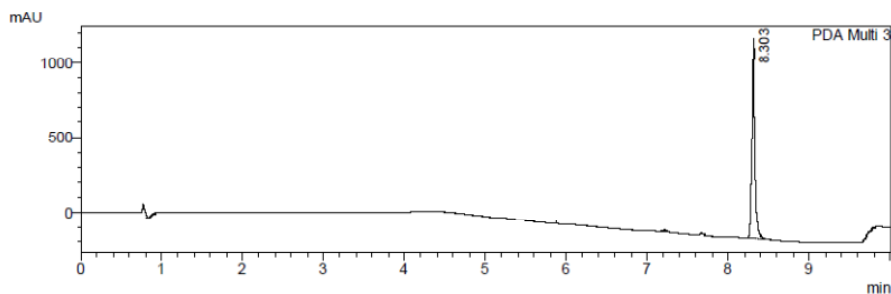

- 1 PDA Multi 1/254nm 4nm
- 2 PDA Multi 3/220nm 4nm

PeakTable

| Peak# | Ret. Time | Area   | Height | Area %  | Height % |
|-------|-----------|--------|--------|---------|----------|
| 1     | 8.303     | 769056 | 265816 | 100.000 | 100.000  |
| Total |           | 769056 | 265816 | 100.000 | 100.000  |

PeakTable

| Peak# | Ret. Time | Area    | Height  | Area %  | Height % |
|-------|-----------|---------|---------|---------|----------|
| 1     | 8.303     | 3644281 | 1338596 | 100.000 | 100.000  |
| Total |           | 3644281 | 1338596 | 100.000 | 100.000  |

C:\LabSolutions\LCsolution\Sun\Hao Lin\HL1-9-1.lcd

# $^1\text{H}$ and $^{13}\text{C}$ NMR for compound 3

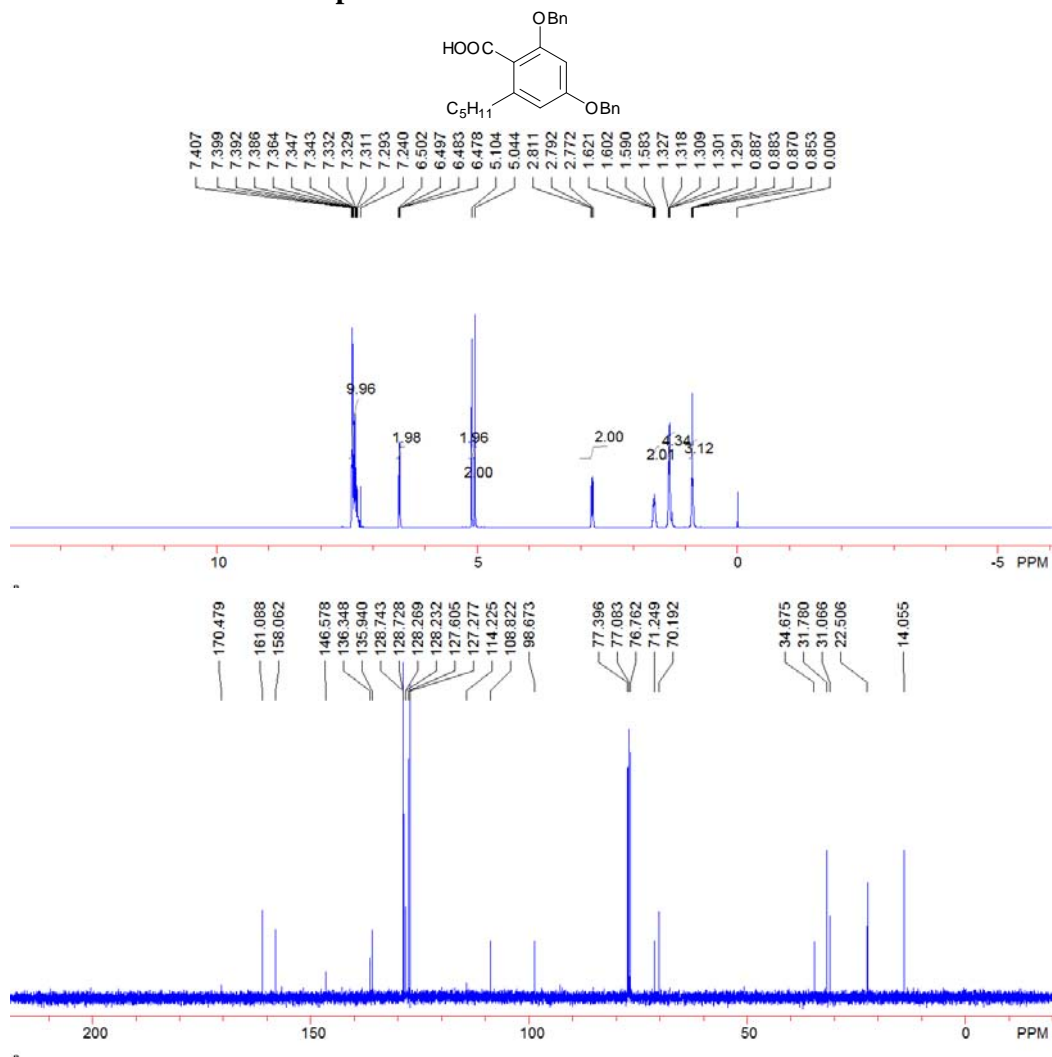



# HPLC for compound 3

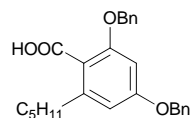

11/12/2012 12:29:30 1 / 1

## ==== Shimadzu LCsolution Analysis Report ====

C:\LabSolutions\LCsolution\Sun\Hao Lin\HL1-12-1.lcd  
 Sample Name : HL1-12-1  
 Tray# : 1  
 Vial# : 61  
 Injection Volume : 15 uL  
 Data File Name : HL1-12-1.lcd  
 Method File Name : SDQ.gradient.lcm  
 Batch File Name :  
 Data Acquired : 11/12/2012 11:55:00 AM

### <Chromatogram>

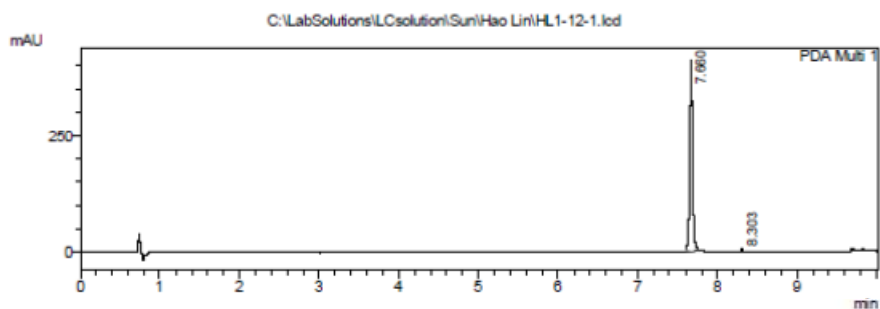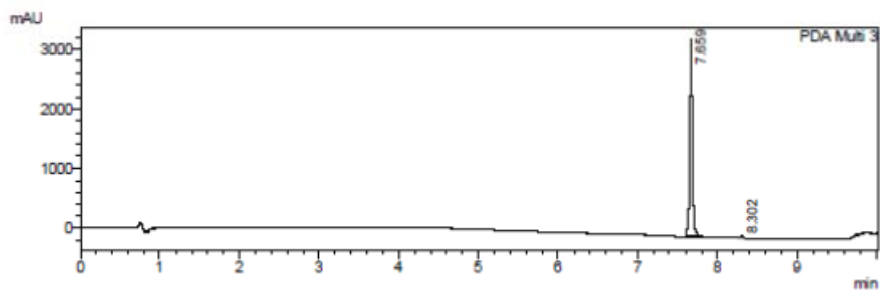

- 1 PDA Multi 1/254nm 4nm
- 2 PDA Multi 3/220nm 4nm

Peak Table

| Peak# | Ret. Time | Area    | Height | Area %  | Height % |
|-------|-----------|---------|--------|---------|----------|
| 1     | 7.660     | 1123058 | 411237 | 98.917  | 98.954   |
| 2     | 8.303     | 12301   | 4345   | 1.083   | 1.046    |
| Total |           | 1135359 | 415582 | 100.000 | 100.000  |

Peak Table

| Peak# | Ret. Time | Area    | Height  | Area %  | Height % |
|-------|-----------|---------|---------|---------|----------|
| 1     | 7.659     | 8248983 | 3309535 | 99.299  | 99.384   |
| 2     | 8.302     | 58226   | 20527   | 0.701   | 0.616    |
| Total |           | 8307210 | 3330062 | 100.000 | 100.000  |

C:\LabSolutions\LCsolution\Sun\Hao Lin\HL1-12-1.lcd

# $^1\text{H}$ and $^{13}\text{C}$ NMR for compound 4

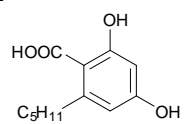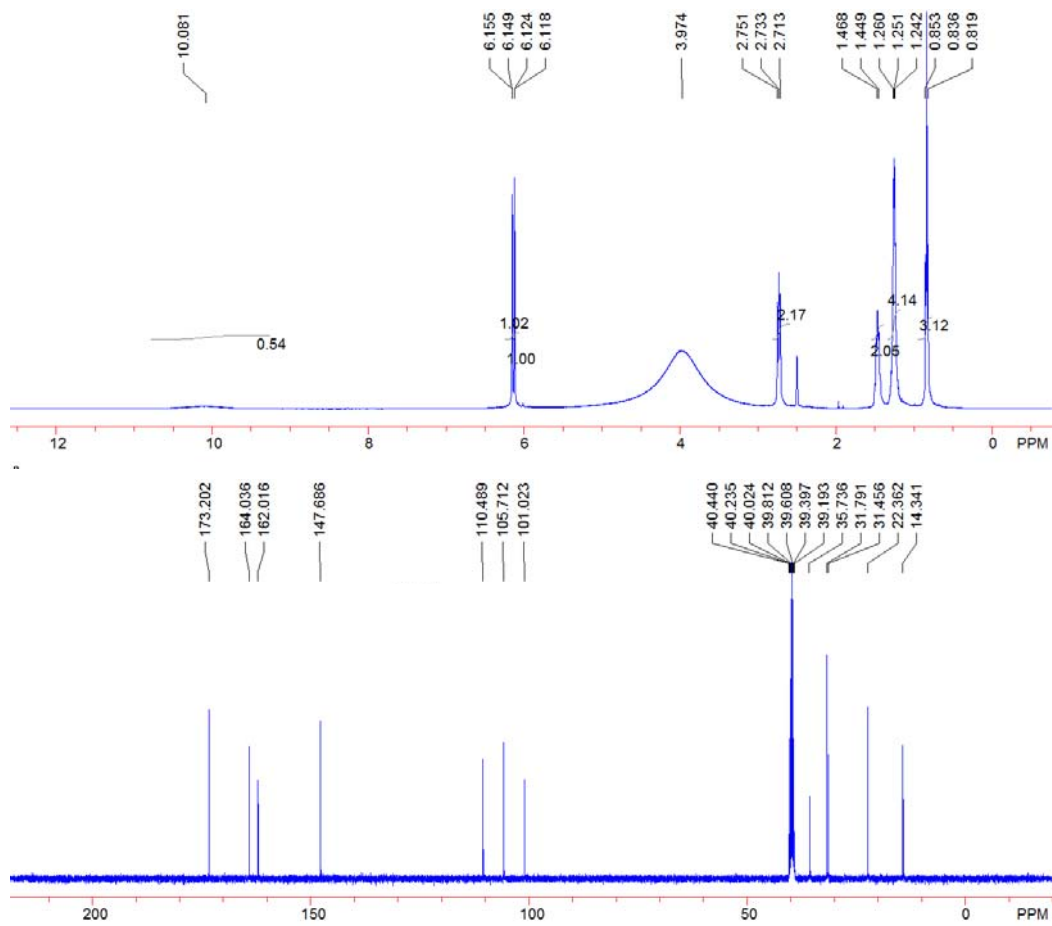

# HPLC for compound 4

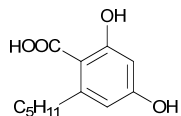

8/17/2013 10:48:17 1 / 1

## ==== Shimadzu LCsolution Analysis Report ====

C:\LabSolutions\LCsolution\Sun\Hao Lin\HL1-15-1.lcd  
 Sample Name : HL1-15-1  
 Tray# : 1  
 Vial # : 61  
 Injection Volume : 5 uL  
 Data File Name : HL1-15-1.lcd  
 Method File Name : SDQ gradient.lcm  
 Batch File Name :  
 Data Acquired : 11/19/2012 3:23:06 PM

### <Chromatogram>

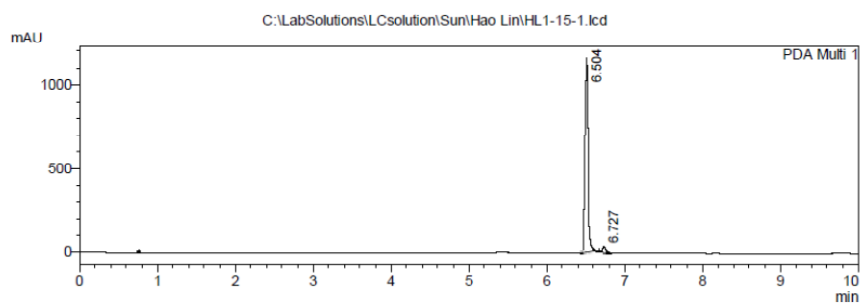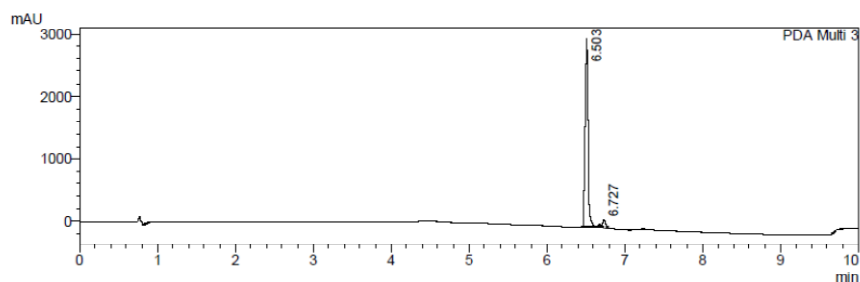

- 1 PDA Multi 1/254nm 4nm
- 2 PDA Multi 3/220nm 4nm

PeakTable

| PDA Ch1 254nm 4nm |           |         |         |         |          |
|-------------------|-----------|---------|---------|---------|----------|
| Peak#             | Ret. Time | Area    | Height  | Area %  | Height % |
| 1                 | 6.504     | 3096627 | 1125054 | 96.475  | 97.299   |
| 2                 | 6.727     | 113135  | 31231   | 3.525   | 2.701    |
| Total             |           | 3209762 | 1156284 | 100.000 | 100.000  |

PeakTable

| PDA Ch3 220nm 4nm |           |         |         |         |          |
|-------------------|-----------|---------|---------|---------|----------|
| Peak#             | Ret. Time | Area    | Height  | Area %  | Height % |
| 1                 | 6.503     | 7422307 | 3019484 | 95.201  | 96.521   |
| 2                 | 6.727     | 374143  | 108846  | 4.799   | 3.479    |
| Total             |           | 7796450 | 3128330 | 100.000 | 100.000  |

C:\LabSolutions\LCsolution\Sun\Hao Lin\HL1-15-1.lcd

# $^1\text{H}$ and $^{13}\text{C}$ NMR for compound 5

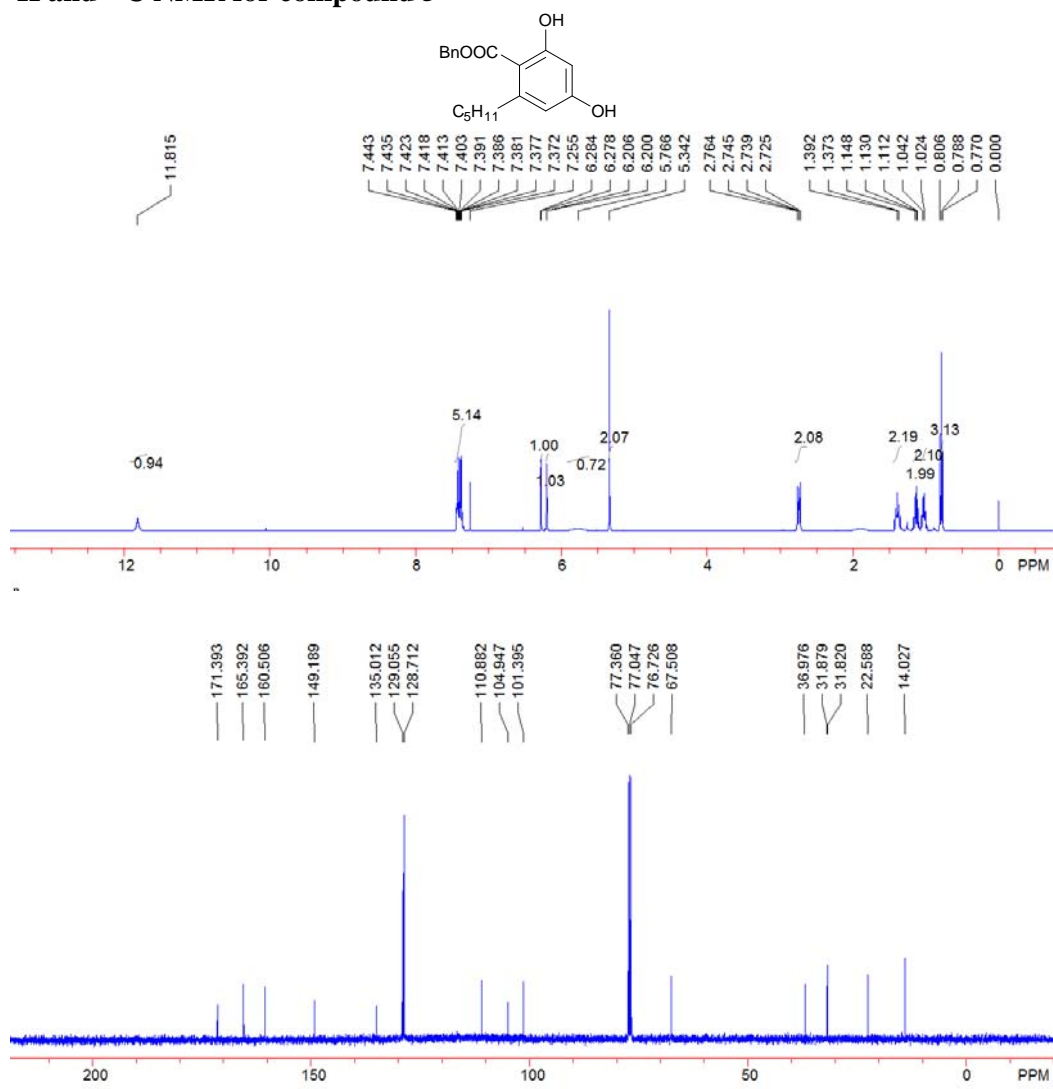

# HPLC for compound 5

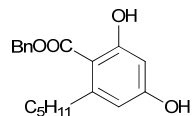

2/4/2013 16:28:09 1 / 1

## ==== Shimadzu LCsolution Analysis Report ====

Sample Name : 1-35-1  
 Tray# : 1  
 Vial # : 61  
 Injection Volume : 5 uL  
 Data File Name : 1-35-1.lcd  
 Method File Name : SDQ gradient.lcm  
 Batch File Name :  
 Data Acquired : 2/4/2013 4:15:11 PM

### <Chromatogram>

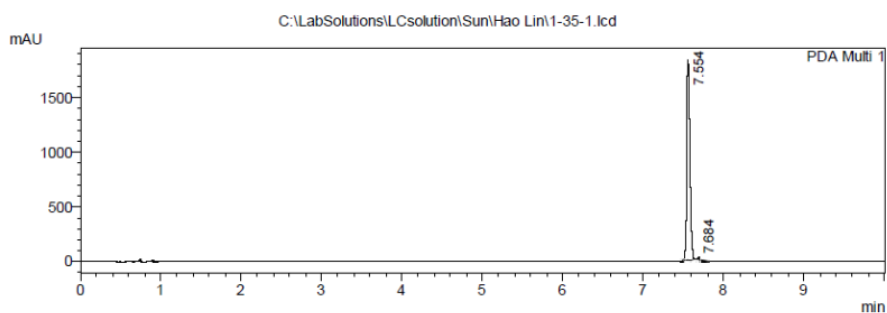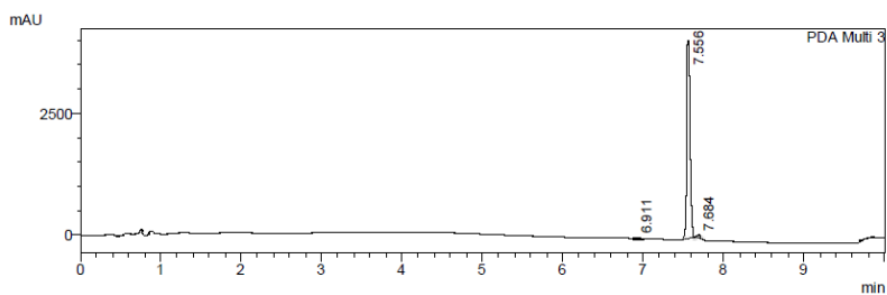

- 1 PDA Multi 1/254nm 4nm
- 2 PDA Multi 3/220nm 4nm

PeakTable

| Peak# | Ret. Time | Area    | Height  | Area %  | Height % |
|-------|-----------|---------|---------|---------|----------|
| 1     | 7.554     | 4823473 | 1804098 | 99.668  | 98.978   |
| 2     | 7.684     | 16062   | 18633   | 0.332   | 1.022    |
| Total |           | 4839535 | 1822730 | 100.000 | 100.000  |

PeakTable

| Peak# | Ret. Time | Area     | Height  | Area %  | Height % |
|-------|-----------|----------|---------|---------|----------|
| 1     | 6.911     | 101670   | 38638   | 0.836   | 0.922    |
| 2     | 7.556     | 11888215 | 4069080 | 97.706  | 97.110   |
| 3     | 7.684     | 177477   | 82470   | 1.459   | 1.968    |
| Total |           | 12167363 | 4190187 | 100.000 | 100.000  |

C:\LabSolutions\LCsolution\Sun\Hao Lin\1-35-1.lcd

# $^1\text{H}$ and $^{13}\text{C}$ NMR for compound 6

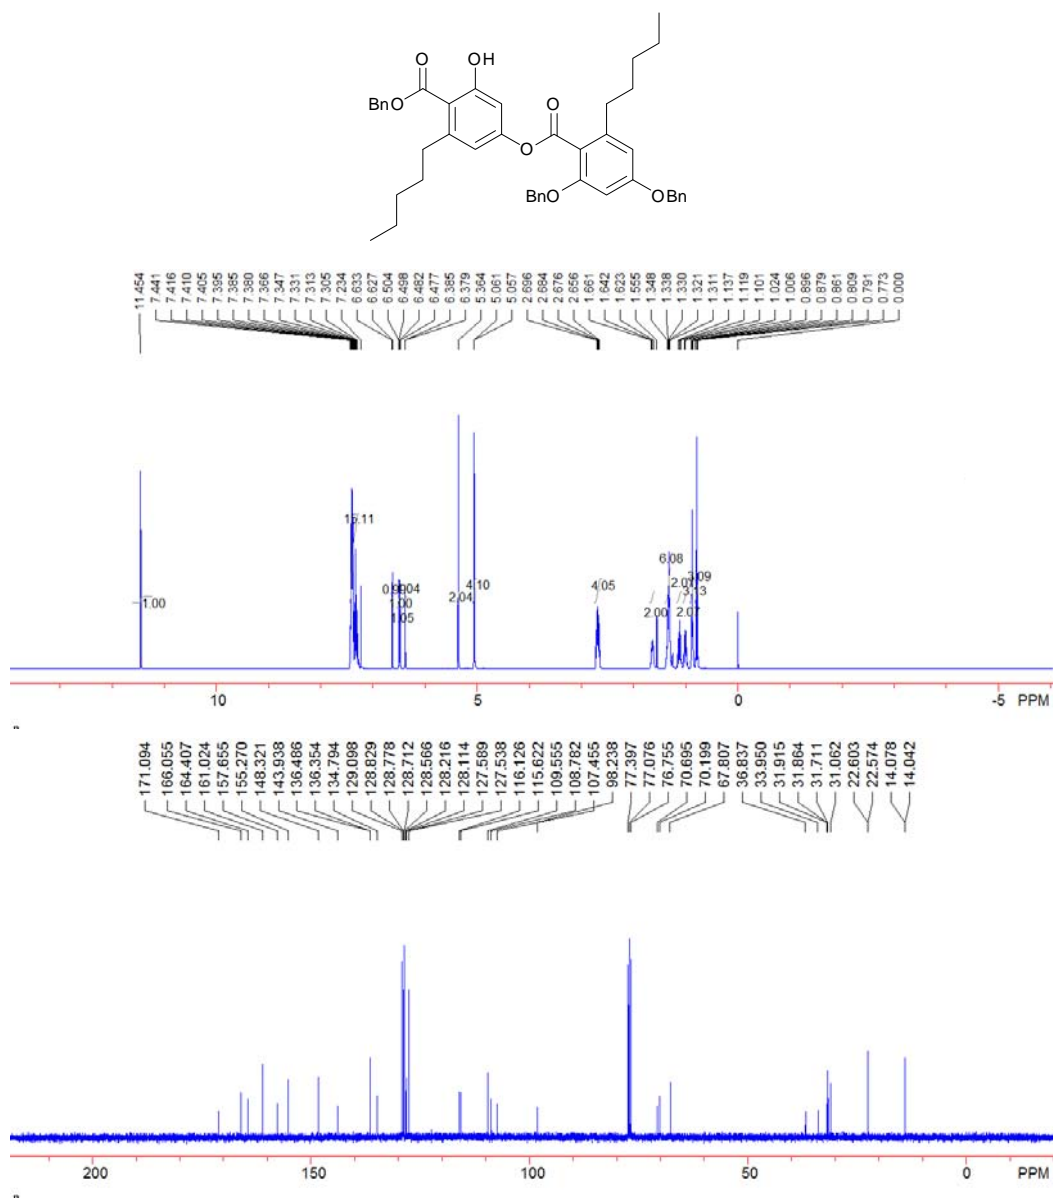

# HPLC for compound 6

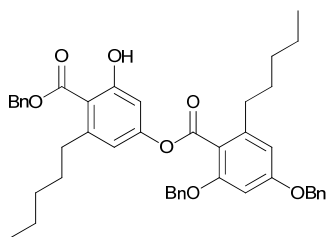

11/27/2012 12:22:57 1 / 1

## ==== Shimadzu LCsolution Analysis Report ====

C:\LabSolutions\LCsolution\Sun\Hao Lin\HL1-23-1.lcd  
 Sample Name : HL1-23-1  
 Tray# : 1  
 Vial # : 61  
 Injection Volume : 5 uL  
 Data File Name : HL1-23-1.lcd  
 Method File Name : SDQ gradient.lcm  
 Batch File Name :  
 Data Acquired : 11/27/2012 12:03:59 PM

### <Chromatogram>

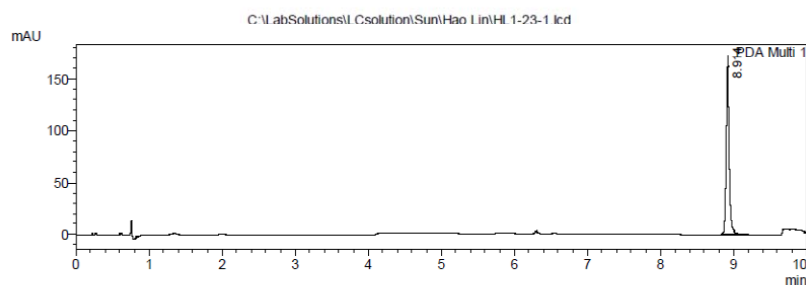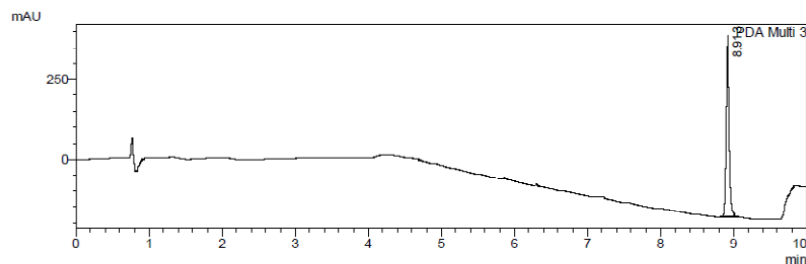

- 1 PDA Multi 1/254nm 4nm
- 2 PDA Multi 3/220nm 4nm

PeakTable

| PDA Ch1 254nm 4nm |           |        |        |         |          |
|-------------------|-----------|--------|--------|---------|----------|
| Peak#             | Ret. Time | Area   | Height | Area %  | Height % |
| 1                 | 8.914     | 499878 | 169449 | 100.000 | 100.000  |
| Total             |           | 499878 | 169449 | 100.000 | 100.000  |

PeakTable

| PDA Ch3 220nm 4nm |           |         |        |         |          |
|-------------------|-----------|---------|--------|---------|----------|
| Peak#             | Ret. Time | Area    | Height | Area %  | Height % |
| 1                 | 8.913     | 1624437 | 568714 | 100.000 | 100.000  |
| Total             |           | 1624437 | 568714 | 100.000 | 100.000  |

C:\LabSolutions\LCsolution\Sun\Hao Lin\HL1-23-1.lcd

# $^1\text{H}$ and $^{13}\text{C}$ NMR for Anziaic acid

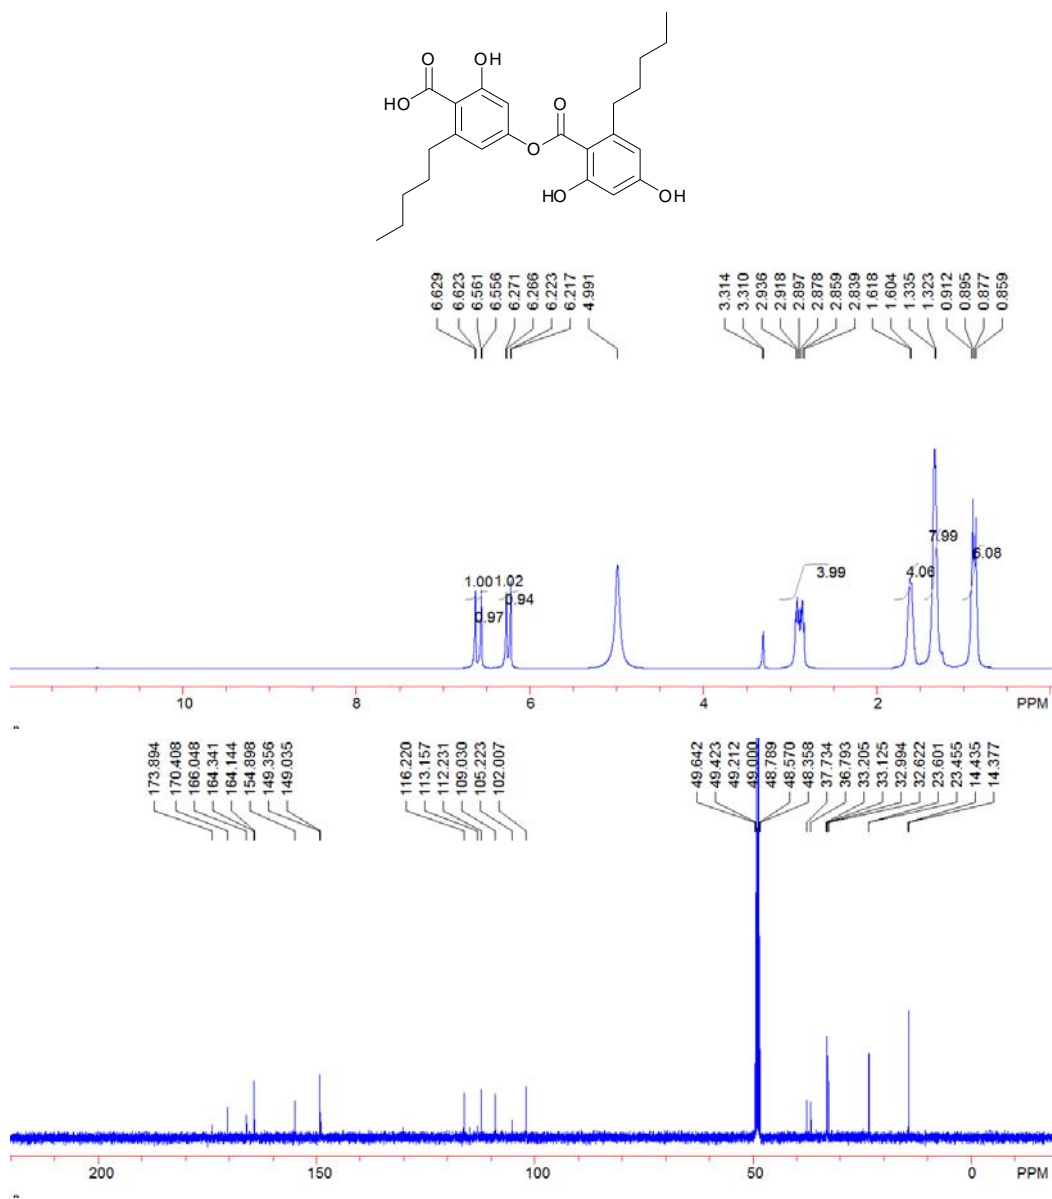



# HPLC for Anziaic acid

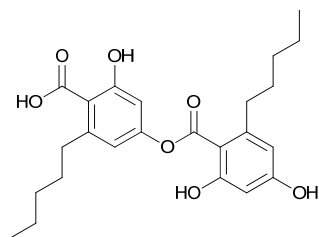

5/7/2013 13:21:21 1 / 1

## ==== Shimadzu LCsolution Analysis Report ====

C:\LabSolutions\LCsolution\Sun\Hao Lin\1-117-1.lcd

Sample Name : 1-117-1  
 Tray# : 1  
 Vial # : 61  
 Injection Volume : 5 uL  
 Data File Name : 1-117-1.lcd  
 Method File Name : SDQ gradient.lcm  
 Batch File Name :  
 Data Acquired : 5/7/2013 10:45:39 AM

### <Chromatogram>

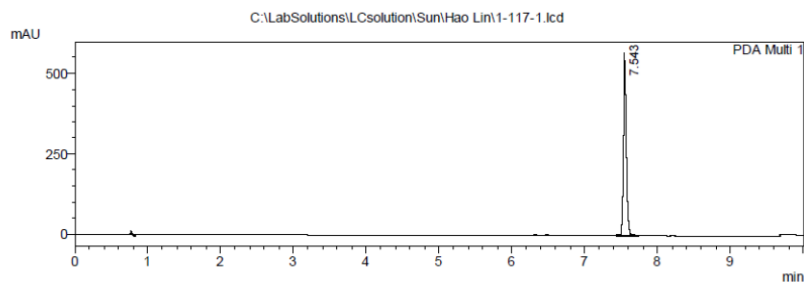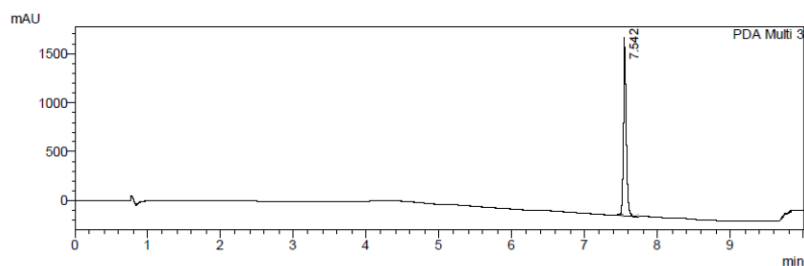

- 1 PDA Multi 1/254nm 4nm
- 2 PDA Multi 3/220nm 4nm

PeakTable

PDA Ch1 254nm 4nm

| Peak# | Ret. Time | Area    | Height | Area %  | Height % |
|-------|-----------|---------|--------|---------|----------|
| 1     | 7.543     | 1606982 | 555677 | 100.000 | 100.000  |
| Total |           | 1606982 | 555677 | 100.000 | 100.000  |

PeakTable

PDA Ch3 220nm 4nm

| Peak# | Ret. Time | Area    | Height  | Area %  | Height % |
|-------|-----------|---------|---------|---------|----------|
| 1     | 7.542     | 4966236 | 1815707 | 100.000 | 100.000  |
| Total |           | 4966236 | 1815707 | 100.000 | 100.000  |

C:\LabSolutions\LCsolution\Sun\Hao Lin\1-117-1.lcd

# <sup>1</sup>H and <sup>13</sup>C NMR for compound 7

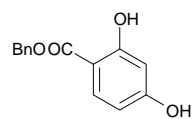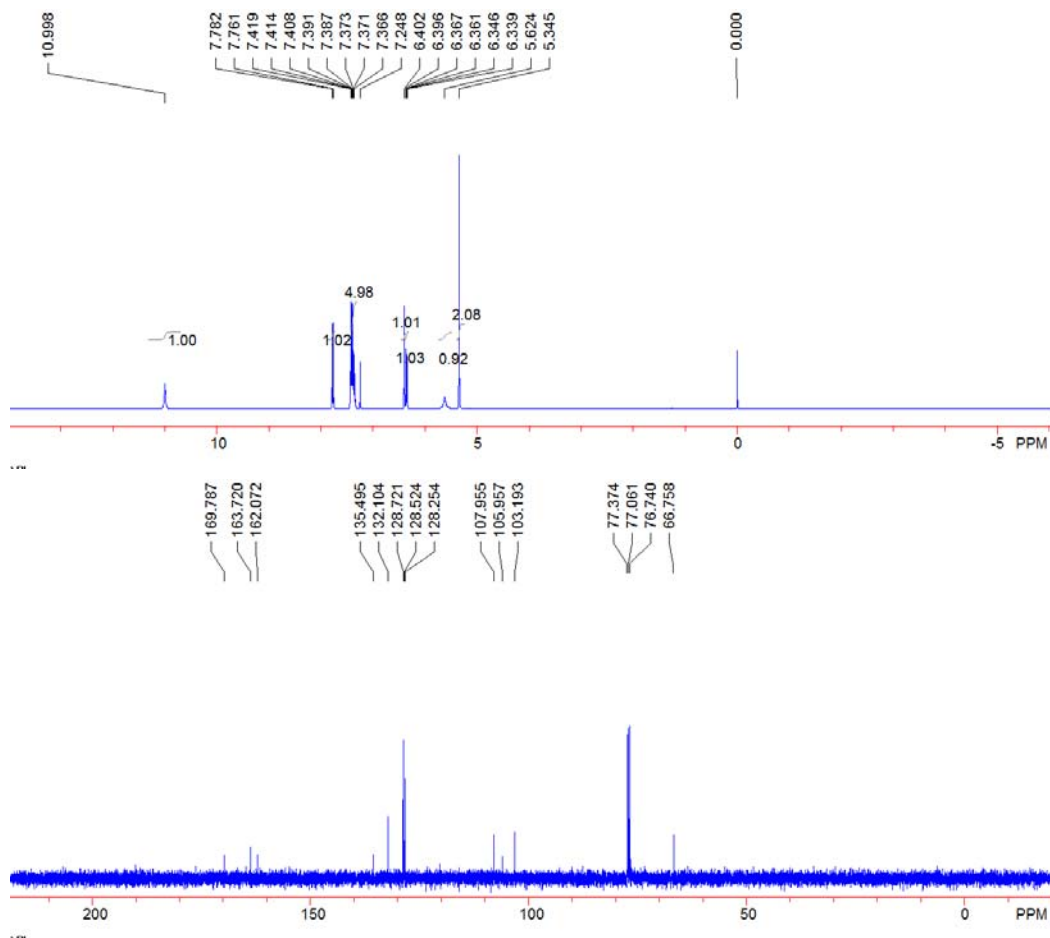

# HPLC for compound 7

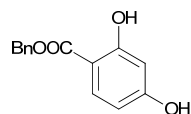

10/29/2012 15:42:36 1 / 1

## ==== Shimadzu LCsolution Analysis Report ====

Sample Name : HL1-3-1-1  
 Tray# : 1  
 Vial # : 61  
 Injection Volume : 5 uL  
 Data File Name : HL1-3-1-1.lcd  
 Method File Name : SDQ.gradient.lcm  
 Batch File Name :  
 Data Acquired : 10/29/2012 2:15:43 PM

### <Chromatogram>

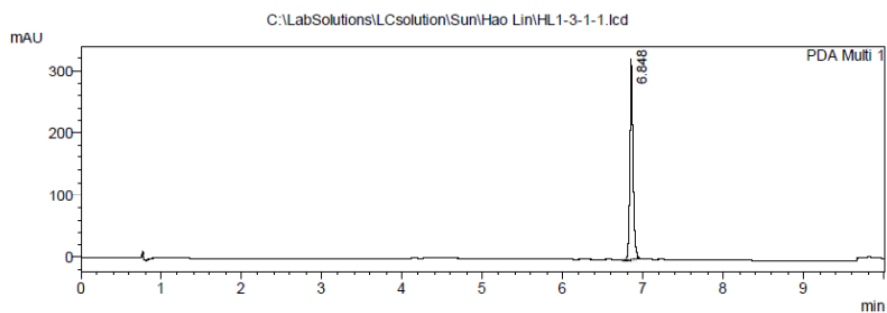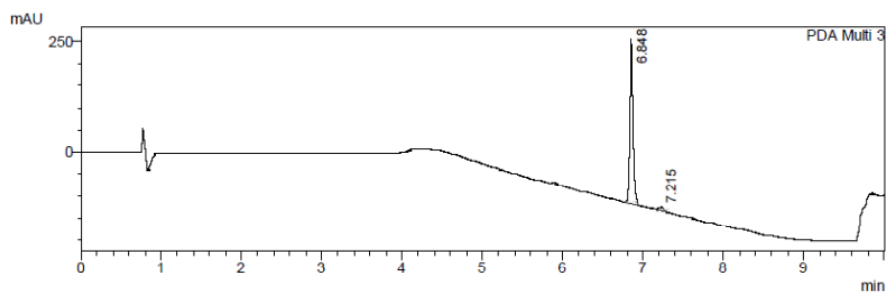

- 1 PDA Multi 1/254nm 4nm
- 2 PDA Multi 3/220nm 4nm

PeakTable

| Peak# | Ret. Time | Area   | Height | Area %  | Height % |
|-------|-----------|--------|--------|---------|----------|
| 1     | 6.848     | 901296 | 313878 | 100.000 | 100.000  |
| Total |           | 901296 | 313878 | 100.000 | 100.000  |

PeakTable

| Peak# | Ret. Time | Area    | Height | Area %  | Height % |
|-------|-----------|---------|--------|---------|----------|
| 1     | 6.848     | 1033081 | 371322 | 97.088  | 97.654   |
| 2     | 7.215     | 30981   | 8922   | 2.912   | 2.346    |
| Total |           | 1064061 | 380243 | 100.000 | 100.000  |

C:\LabSolutions\LCsolution\Sun\Hao Lin\HL1-3-1-1.lcd

# $^1\text{H}$ and $^{13}\text{C}$ NMR for 2,4-bis(benzyloxy)benzaldehyde

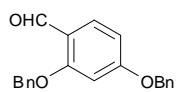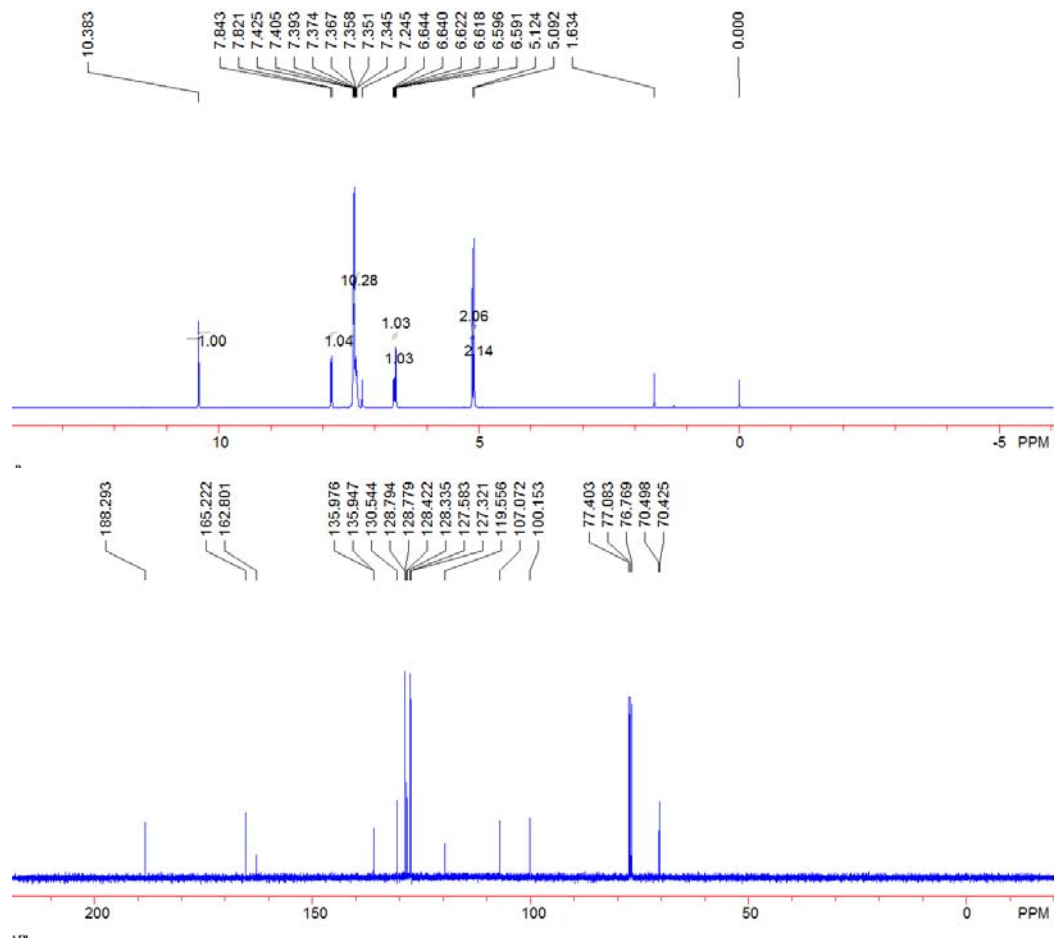

# HPLC for 2,4-bis(benzyloxy)benzaldehyde

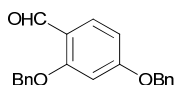

11/8/2012 12:03:28 1 / 1

## ==== Shimadzu LCsolution Analysis Report ====

C:\LabSolutions\LCsolution\Sun\Hao Lin\HL1-3-2-2.lcd  
 Sample Name : HL1-3-2-2  
 Tray# : 1  
 Vial# : 61  
 Injection Volume : 15 uL  
 Data File Name : HL1-3-2-2.lcd  
 Method File Name : SDQ gradient.lcm  
 Batch File Name :  
 Data Acquired : 11/8/2012 11:51:39 AM

### <Chromatogram>

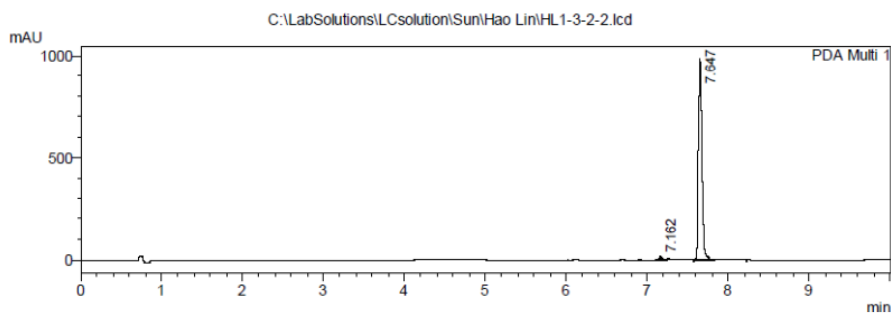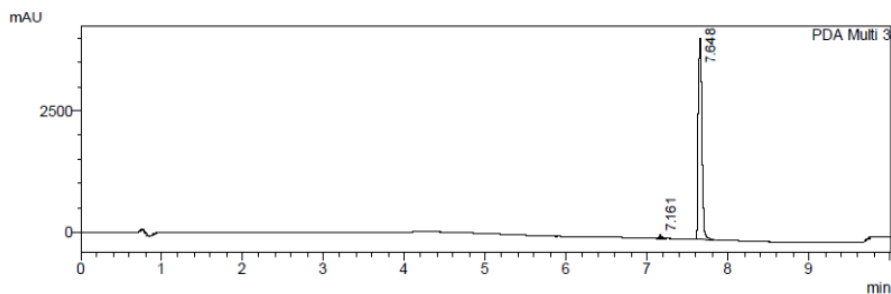

- 1 PDA Multi 1/254nm 4nm
- 2 PDA Multi 3/220nm 4nm

PeakTable

PDA Ch1 254nm 4nm

| Peak# | Ret. Time | Area    | Height | Area %  | Height % |
|-------|-----------|---------|--------|---------|----------|
| 1     | 7.162     | 37633   | 14314  | 1.333   | 1.460    |
| 2     | 7.647     | 2785244 | 966341 | 98.667  | 98.540   |
| Total |           | 2822877 | 980654 | 100.000 | 100.000  |

PeakTable

PDA Ch3 220nm 4nm

| Peak# | Ret. Time | Area     | Height  | Area %  | Height % |
|-------|-----------|----------|---------|---------|----------|
| 1     | 7.161     | 156121   | 59808   | 1.300   | 1.422    |
| 2     | 7.648     | 11855628 | 4144993 | 98.700  | 98.578   |
| Total |           | 12011750 | 4204801 | 100.000 | 100.000  |

C:\LabSolutions\LCsolution\Sun\Hao Lin\HL1-3-2-2.lcd

# $^1\text{H}$ and $^{13}\text{C}$ NMR for compound 9

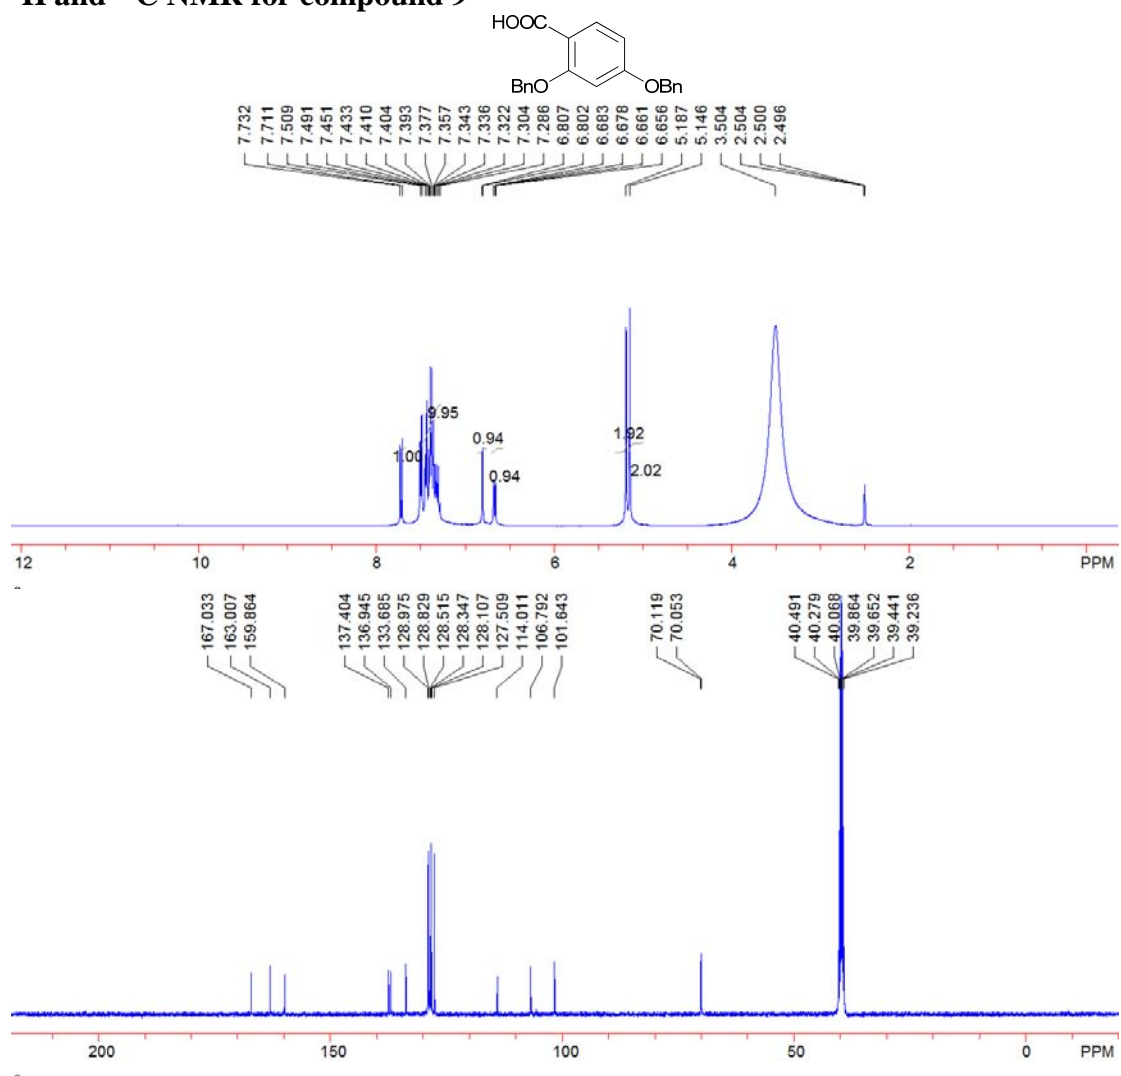

# HPLC for compound 9

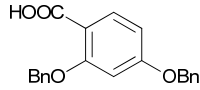

5/10/2013 16:19:59 1 / 1

## ==== Shimadzu LCsolution Analysis Report ====

Sample Name : 1-34-C  
 Tray# : 1  
 Vial # : 61  
 Injection Volume : 5 uL  
 Data File Name : 1-34-C.lcd  
 Method File Name : SDQ gradient.lcm  
 Batch File Name :  
 Data Acquired : 5/10/2013 4:07:25 PM

### <Chromatogram>

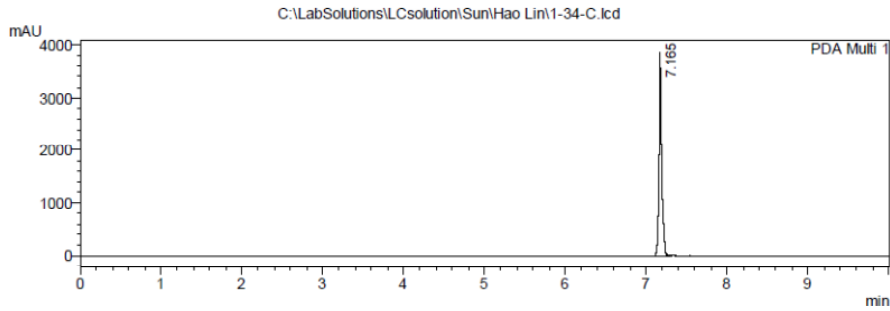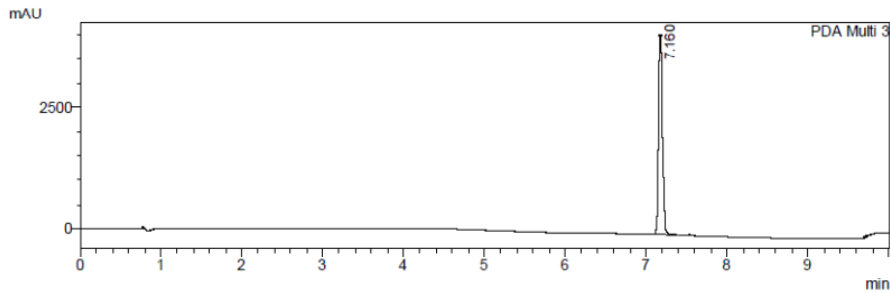

- 1 PDA Multi 1/254nm 4nm
- 2 PDA Multi 3/220nm 4nm

PeakTable

| Peak# | Ret. Time | Area     | Height  | Area %  | Height % |
|-------|-----------|----------|---------|---------|----------|
| 1     | 7.165     | 10055200 | 3782986 | 100.000 | 100.000  |
| Total |           | 10055200 | 3782986 | 100.000 | 100.000  |

PeakTable

| Peak# | Ret. Time | Area     | Height  | Area %  | Height % |
|-------|-----------|----------|---------|---------|----------|
| 1     | 7.160     | 15533017 | 4119729 | 100.000 | 100.000  |
| Total |           | 15533017 | 4119729 | 100.000 | 100.000  |

C:\LabSolutions\LCsolution\Sun\Hao Lin\1-34-C.lcd

# <sup>1</sup>H NMR for compound 12

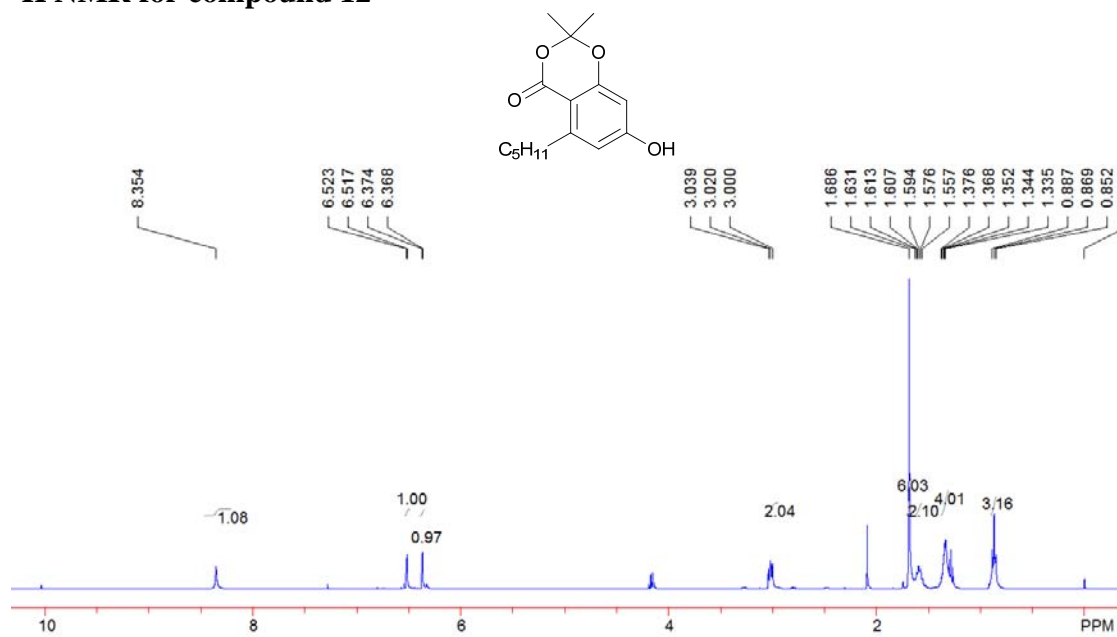



# HPLC for compound 12

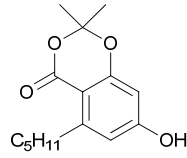

7/5/2013 11:59:08 1 / 1

## ==== Shimadzu LCsolution Analysis Report ====

C:\LabSolutions\LCsolution\Sun\Hao Lin\1-86-1.lcd

Sample Name : 1-86-1  
 Tray# : 1  
 Vial # : 61  
 Injection Volume : 5 uL  
 Data File Name : 1-86-1.lcd  
 Method File Name : SDQ gradient.lcm  
 Batch File Name :  
 Data Acquired : 4/10/2013 11:03:05 AM

### <Chromatogram>

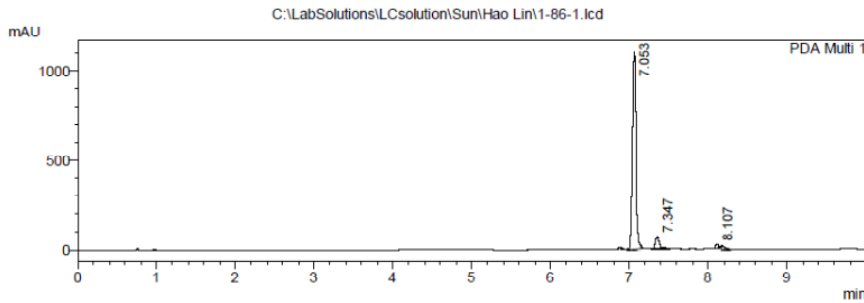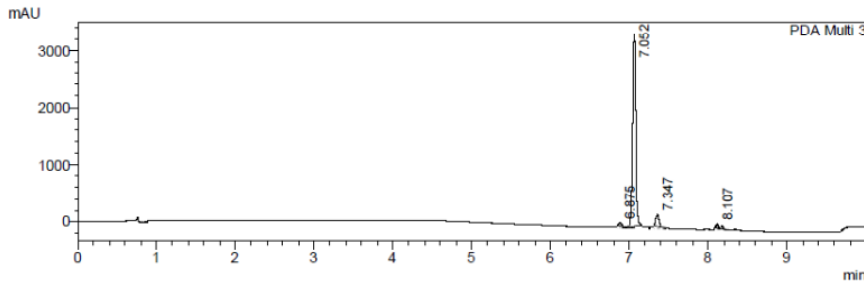

- 1 PDA Multi 1/254nm 4nm
- 2 PDA Multi 3/220nm 4nm

PeakTable

PDA Ch1 254nm 4nm

| Peak# | Ret. Time | Area    | Height  | Area %  | Height % |
|-------|-----------|---------|---------|---------|----------|
| 1     | 7.053     | 3182446 | 1094335 | 89.600  | 91.819   |
| 2     | 7.347     | 230110  | 69433   | 6.483   | 5.826    |
| 3     | 8.107     | 136914  | 28073   | 3.857   | 2.355    |
| Total |           | 3549470 | 1191841 | 100.000 | 100.000  |

PeakTable

PDA Ch3 220nm 4nm

| Peak# | Ret. Time | Area    | Height  | Area %  | Height % |
|-------|-----------|---------|---------|---------|----------|
| 1     | 6.875     | 132626  | 68053   | 1.420   | 1.843    |
| 2     | 7.052     | 8423894 | 3357897 | 90.196  | 90.928   |
| 3     | 7.347     | 543212  | 206974  | 5.816   | 5.605    |
| 4     | 8.107     | 239794  | 60010   | 2.568   | 1.625    |
| Total |           | 9339526 | 3692933 | 100.000 | 100.000  |

C:\LabSolutions\LCsolution\Sun\Hao Lin\1-86-1.lcd

# $^1\text{H}$ and $^{13}\text{C}$ NMR for compound 10a

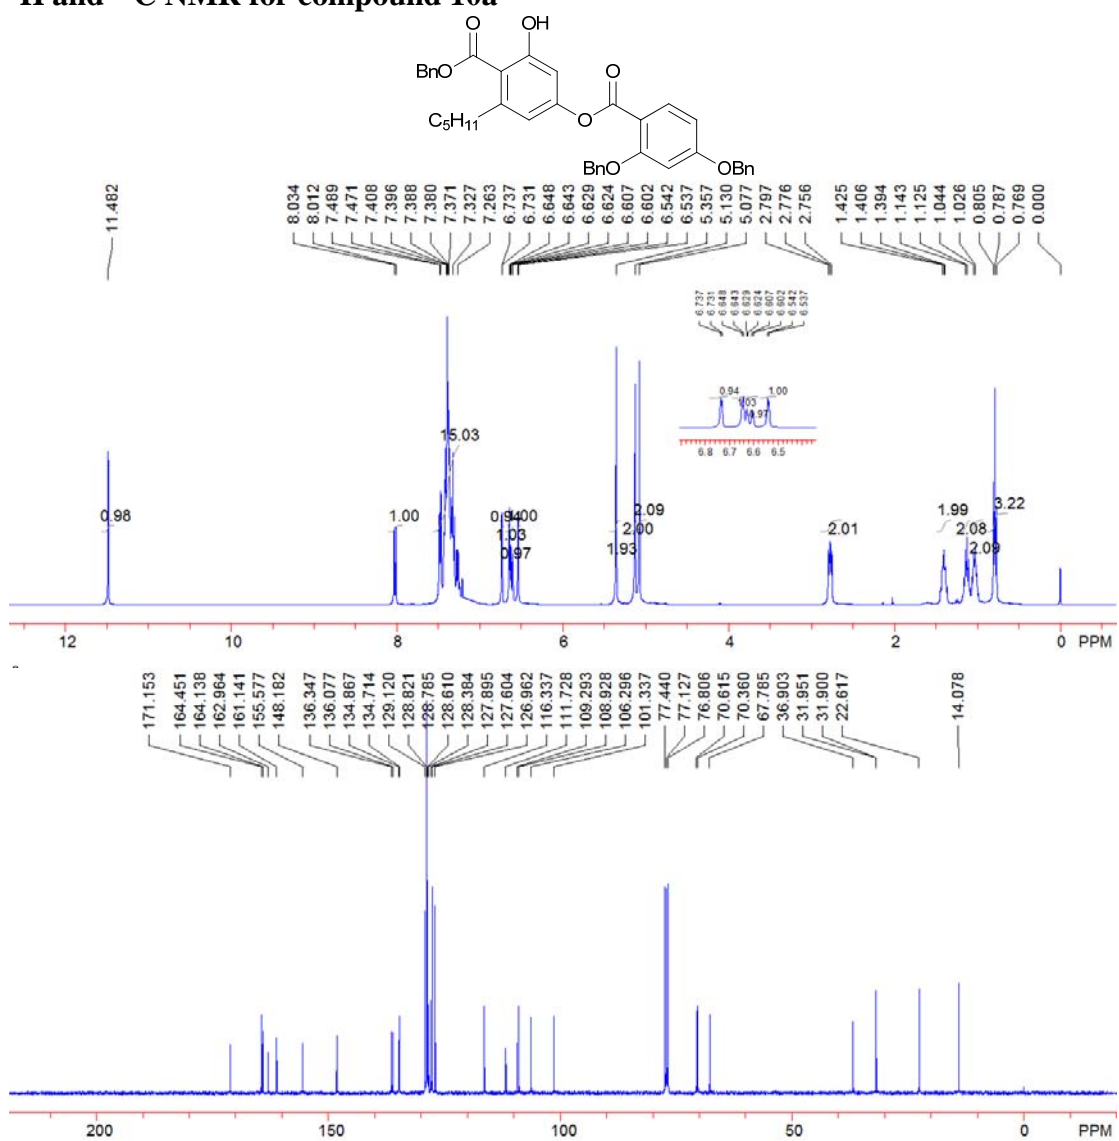

# HPLC for compound 10a

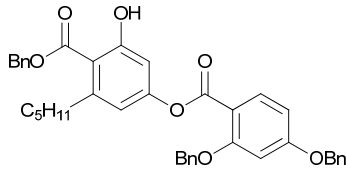

4/24/2013 15:21:25 1 / 1

## ==== Shimadzu LCsolution Analysis Report ====

C:\LabSolutions\LCsolution\Sun\Hao Lin\1-111-1.lcd  
 Sample Name : 1-111-1  
 Tray# : 1  
 Vial # : 61  
 Injection Volume : 5 uL  
 Data File Name : 1-111-1.lcd  
 Method File Name : SDQ gradient.lcm  
 Batch File Name :  
 Data Acquired : 4/24/2013 3:10:30 PM

### <Chromatogram>

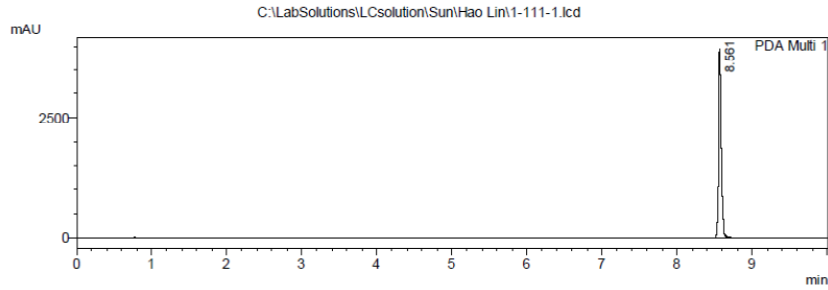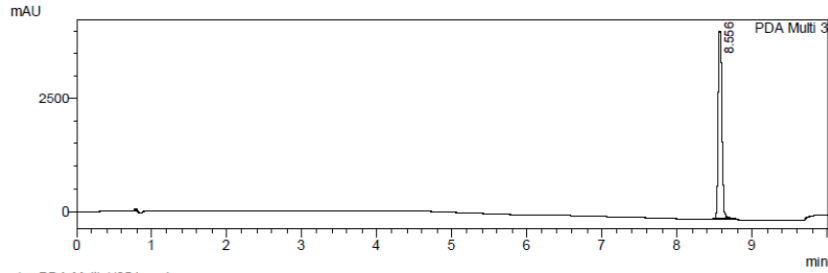

- 1 PDA Multi 1/254nm 4nm
- 2 PDA Multi 3/220nm 4nm

PeakTable

| Peak# | Ret. Time | Area    | Height  | Area %  | Height % |
|-------|-----------|---------|---------|---------|----------|
| 1     | 8.561     | 9872927 | 3821836 | 100.000 | 100.000  |
| Total |           | 9872927 | 3821836 | 100.000 | 100.000  |

PeakTable

| Peak# | Ret. Time | Area     | Height  | Area %  | Height % |
|-------|-----------|----------|---------|---------|----------|
| 1     | 8.556     | 15323924 | 4161075 | 100.000 | 100.000  |
| Total |           | 15323924 | 4161075 | 100.000 | 100.000  |

C:\LabSolutions\LCsolution\Sun\Hao Lin\1-111-1.lcd

# $^1\text{H}$ and $^{13}\text{C}$ NMR for compound 10b

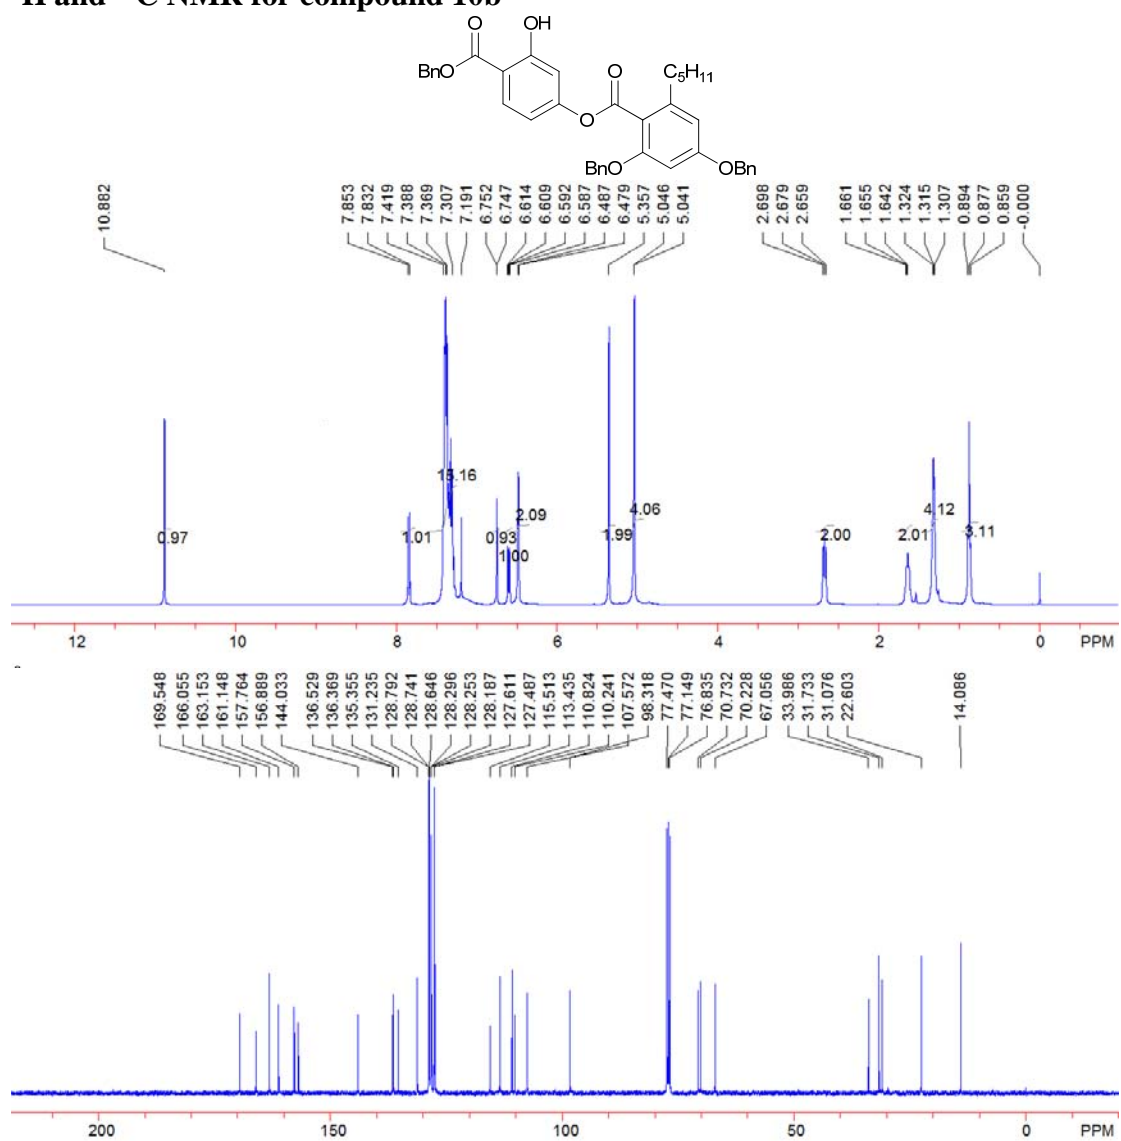

# HPLC for compound 10b

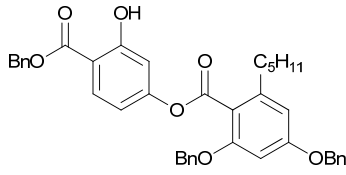

4/17/2013 14:47:38 1 / 1

## ==== Shimadzu LCsolution Analysis Report ====

Sample Name : 1-104-1  
 Tray# : 1  
 Vial # : 61  
 Injection Volume : 10 uL  
 Data File Name : 1-104-1.lcd  
 Method File Name : SDQ gradient.lcm  
 Batch File Name :  
 Data Acquired : 4/17/2013 2:17:15 PM

### <Chromatogram>

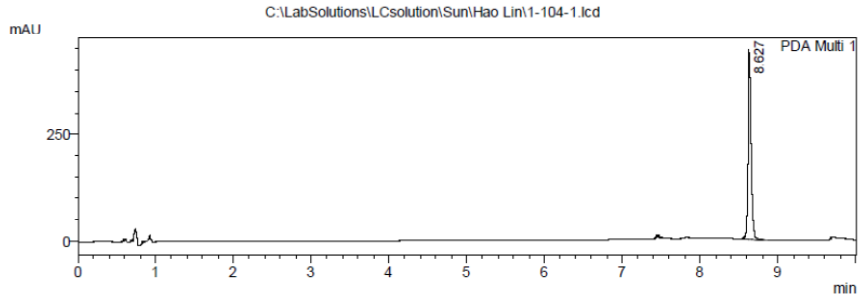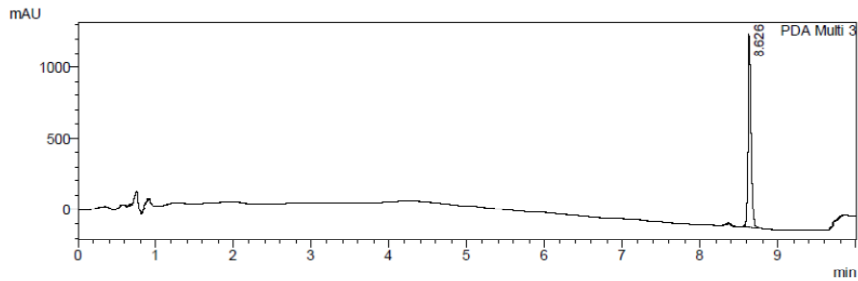

- 1 PDA Multi 1/254nm 4nm
- 2 PDA Multi 3/220nm 4nm

PeakTable

| Peak# | Ret. Time | Area    | Height | Area %  | Height % |
|-------|-----------|---------|--------|---------|----------|
| 1     | 8.627     | 1235365 | 439541 | 100.000 | 100.000  |
| Total |           | 1235365 | 439541 | 100.000 | 100.000  |

PeakTable

| Peak# | Ret. Time | Area    | Height  | Area %  | Height % |
|-------|-----------|---------|---------|---------|----------|
| 1     | 8.626     | 3693645 | 1359655 | 100.000 | 100.000  |
| Total |           | 3693645 | 1359655 | 100.000 | 100.000  |

C:\LabSolutions\LCsolution\Sun\Hao Lin\1-104-1.lcd

# $^1\text{H}$ and $^{13}\text{C}$ NMR for compound 10c

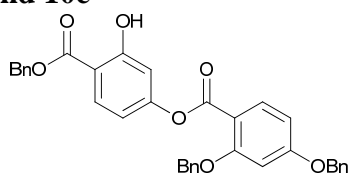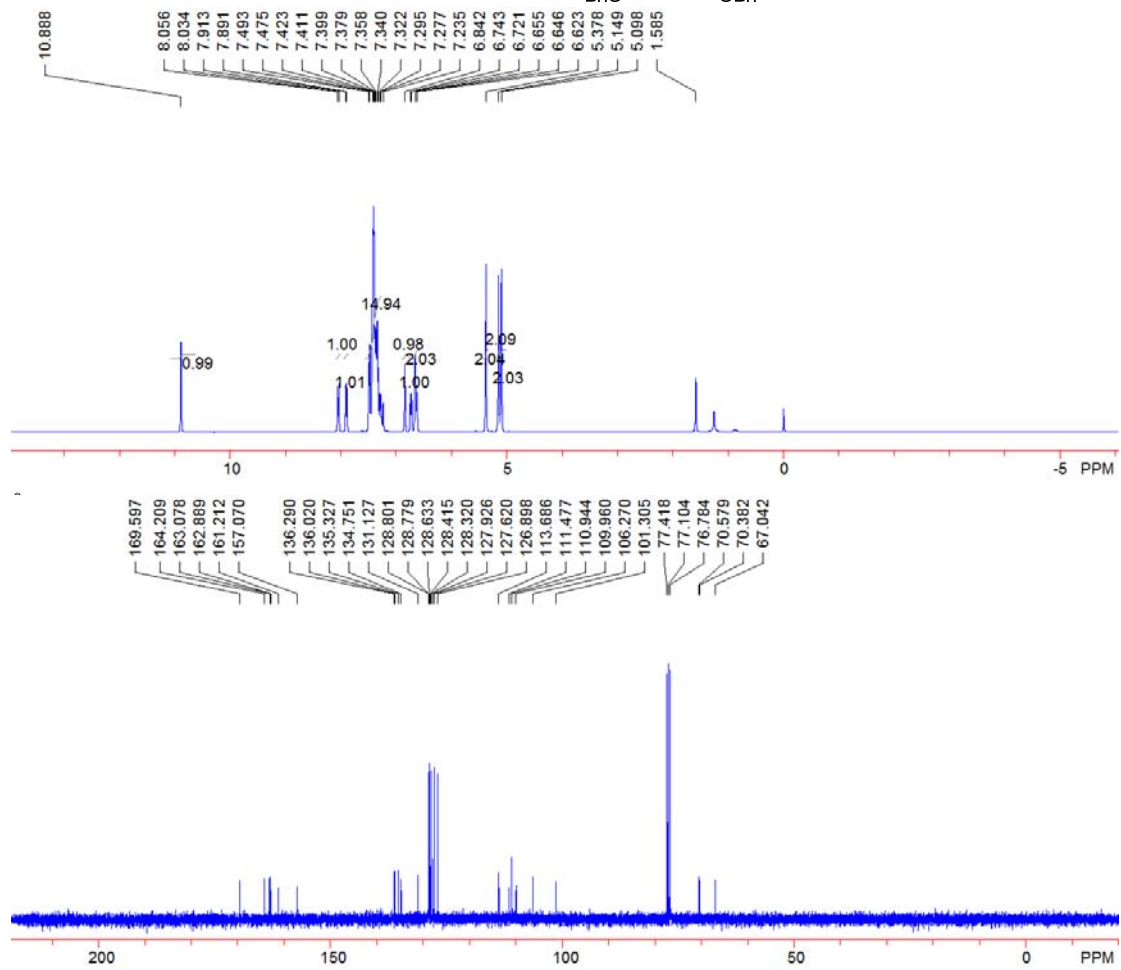

# HPLC for compound 10c

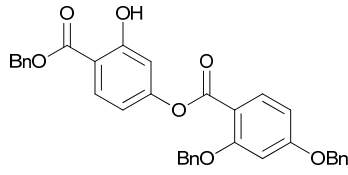

11/26/2012 10:27:27 1 / 1

## ==== Shimadzu LCsolution Analysis Report ====

Sample Name : HL1-20-1  
 Tray# : 1  
 Vial # : 61  
 Injection Volume : 10 uL  
 Data File Name : HL1-20-1.lcd  
 Method File Name : SDQ gradient.icm  
 Batch File Name :  
 Data Acquired : 11/26/2012 10:03:10 AM

### <Chromatogram>

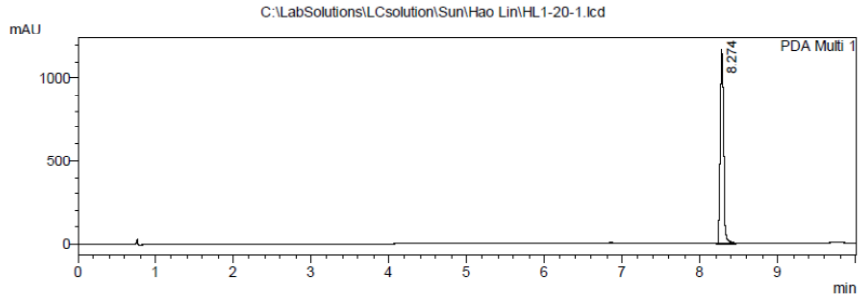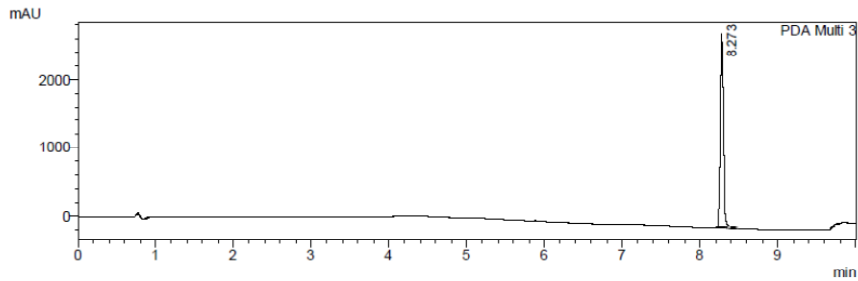

- 1 PDA Multi 1/254nm 4nm
- 2 PDA Multi 3/220nm 4nm

PeakTable

| Peak# | Ret. Time | Area    | Height  | Area %  | Height % |
|-------|-----------|---------|---------|---------|----------|
| 1     | 8.274     | 3139171 | 1147617 | 100.000 | 100.000  |
| Total |           | 3139171 | 1147617 | 100.000 | 100.000  |

PeakTable

| Peak# | Ret. Time | Area    | Height  | Area %  | Height % |
|-------|-----------|---------|---------|---------|----------|
| 1     | 8.273     | 6747038 | 2837832 | 100.000 | 100.000  |
| Total |           | 6747038 | 2837832 | 100.000 | 100.000  |

C:\LabSolutions\LCsolution\Sun\Hao Lin\HL1-20-1.lcd

# $^1\text{H}$ and $^{13}\text{C}$ NMR for compound 10d

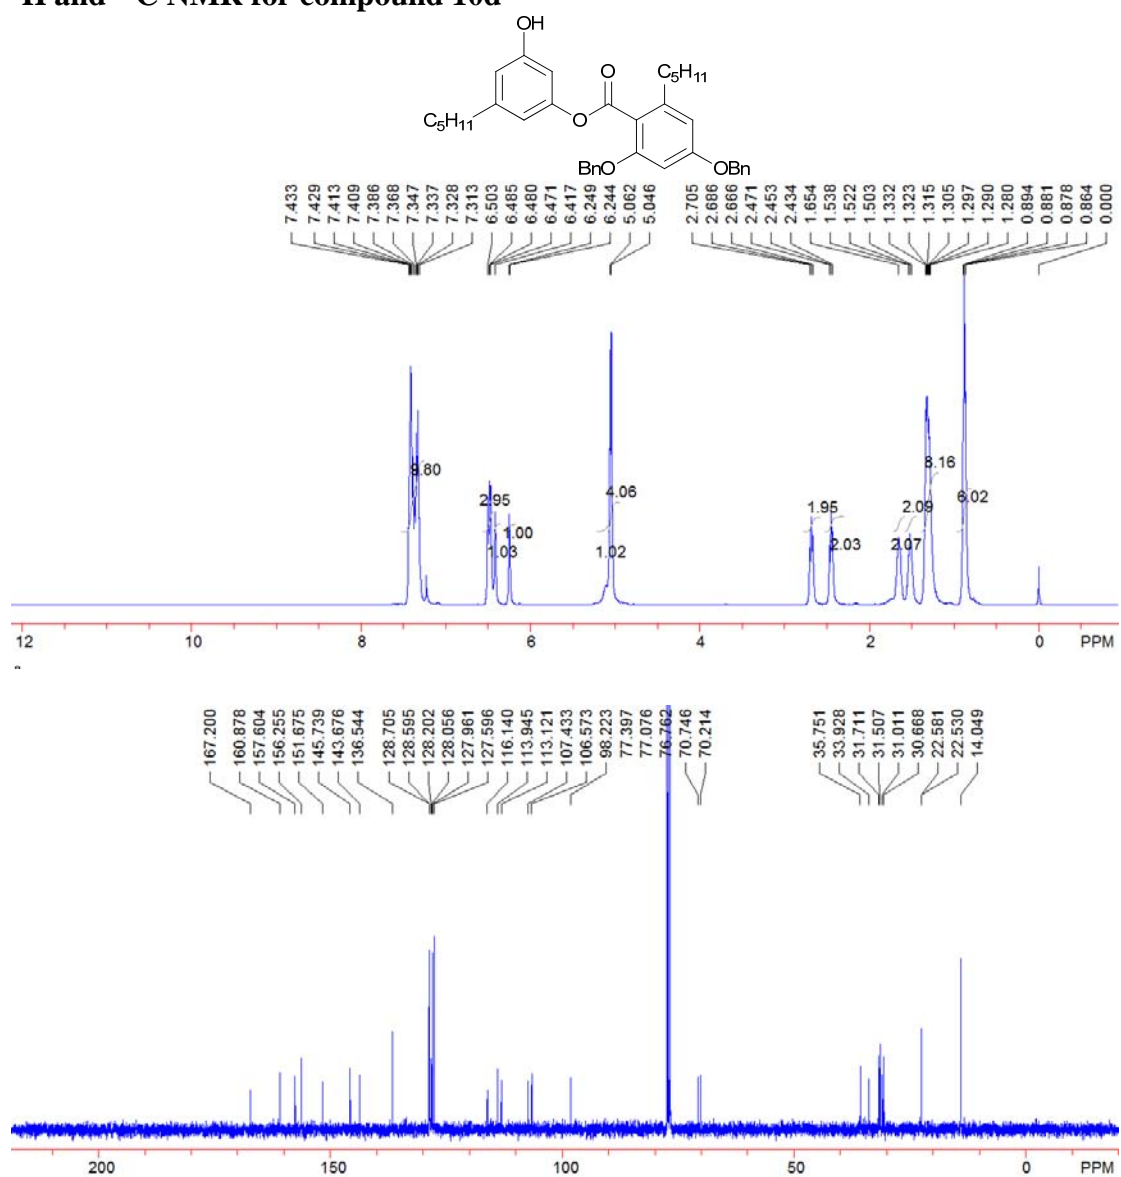



# HPLC for compound 10d

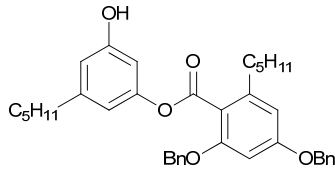

4/4/2013 10:04:52 1 / 1

## ==== Shimadzu LCsolution Analysis Report ====

Sample Name : 1-92-1  
 Tray# : 1  
 Vial # : 61  
 Injection Volume : 5 uL  
 Data File Name : 1-92-1.lcd  
 Method File Name : SDQ gradient.lcm  
 Batch File Name :  
 Data Acquired : 4/4/2013 9:38:02 AM

### <Chromatogram>

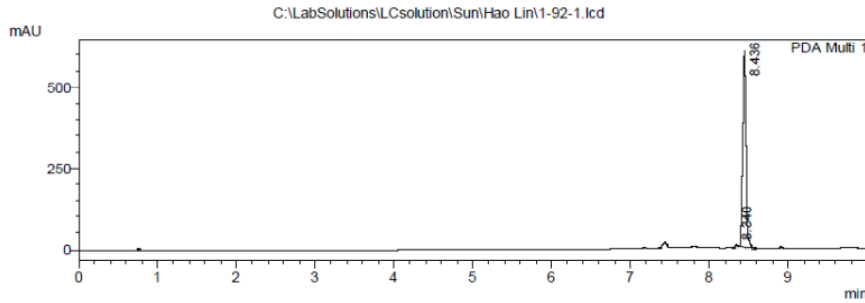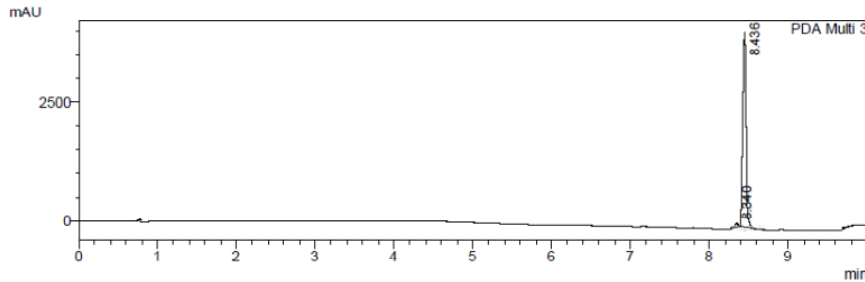

- 1 PDA Multi 1/254nm 4nm
- 2 PDA Multi 3/220nm 4nm

PeakTable

PDA Ch1 254nm 4nm

| Peak# | Ret. Time | Area    | Height | Area %  | Height % |
|-------|-----------|---------|--------|---------|----------|
| 1     | 8.340     | 20052   | 8964   | 1.206   | 1.474    |
| 2     | 8.436     | 1642087 | 599356 | 98.794  | 98.526   |
| Total |           | 1662139 | 608320 | 100.000 | 100.000  |

PeakTable

PDA Ch3 220nm 4nm

| Peak# | Ret. Time | Area     | Height  | Area %  | Height % |
|-------|-----------|----------|---------|---------|----------|
| 1     | 8.340     | 146226   | 66777   | 1.287   | 1.598    |
| 2     | 8.436     | 11219658 | 4110766 | 98.713  | 98.402   |
| Total |           | 11365885 | 4177543 | 100.000 | 100.000  |

C:\LabSolutions\LCsolution\Sun\Hao Lin\1-92-1.lcd

# $^1\text{H}$ and $^{13}\text{C}$ NMR for compound 13

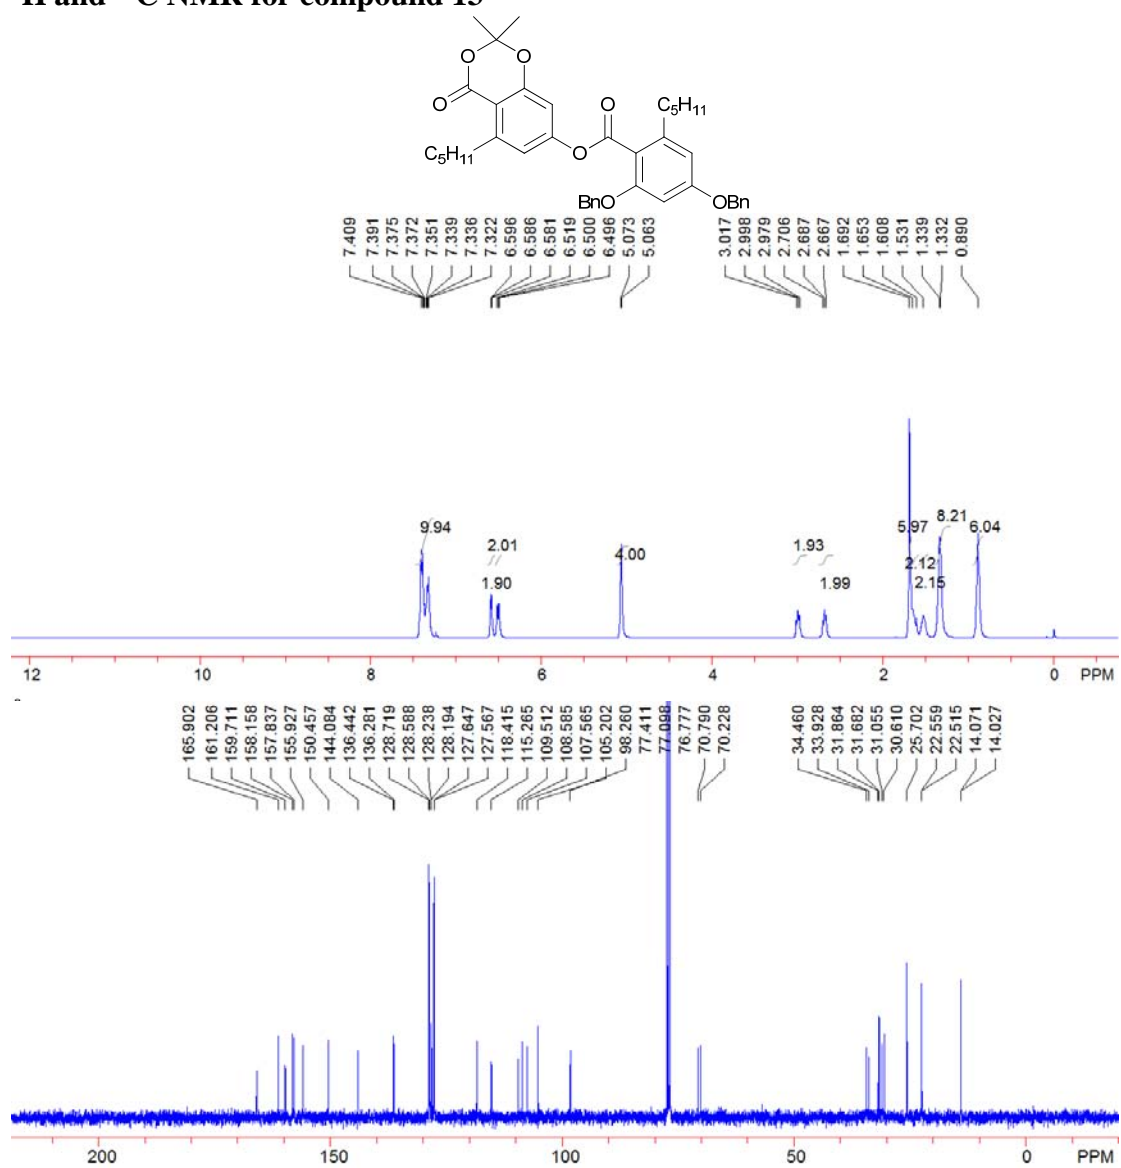

# HPLC for compound 13

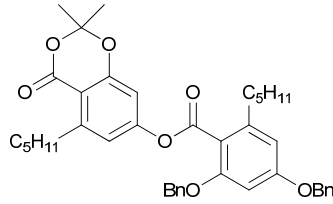

4/4/2013 11:27:01 1 / 1

## ==== Shimadzu LCsolution Analysis Report ====

Sample Name : 1-93-1  
 Tray# : 1  
 Vial # : 61  
 Injection Volume : 5 uL  
 Data File Name : 1-93-1.lcd  
 Method File Name : SDQ gradient.lcm  
 Batch File Name :  
 Data Acquired : 4/4/2013 10:03:48 AM

### <Chromatogram>

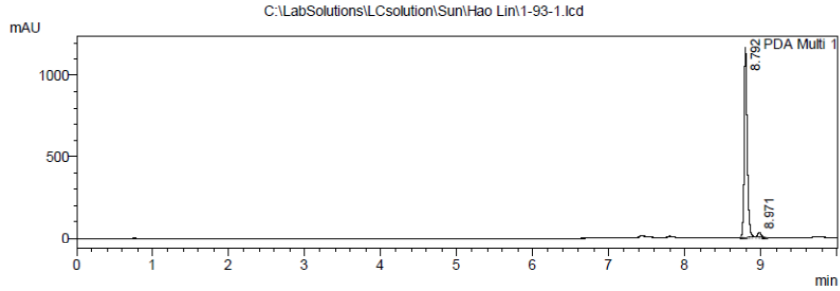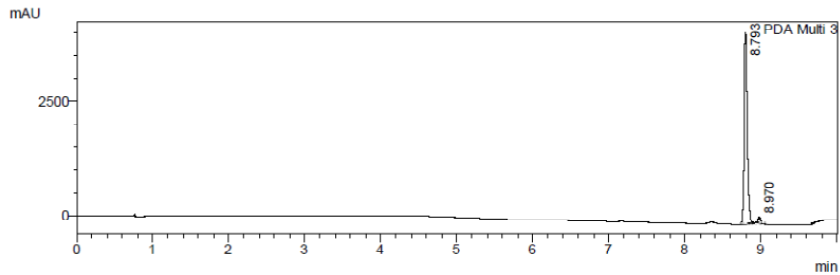

- 1 PDA Multi 1/254nm 4nm
- 2 PDA Multi 3/220nm 4nm

PeakTable

| Peak# | Ret. Time | Area    | Height  | Area %  | Height % |
|-------|-----------|---------|---------|---------|----------|
| 1     | 8.792     | 3258076 | 1135672 | 97.738  | 97.681   |
| 2     | 8.971     | 75407   | 26959   | 2.262   | 2.319    |
| Total |           | 3333483 | 1162631 | 100.000 | 100.000  |

PeakTable

| Peak# | Ret. Time | Area     | Height  | Area %  | Height % |
|-------|-----------|----------|---------|---------|----------|
| 1     | 8.793     | 12190519 | 4166535 | 97.184  | 97.007   |
| 2     | 8.970     | 353282   | 128563  | 2.816   | 2.993    |
| Total |           | 12543801 | 4295098 | 100.000 | 100.000  |

C:\LabSolutions\LCsolution\Sun\Hao Lin\1-93-1.lcd

# $^1\text{H}$ and $^{13}\text{C}$ NMR for compound 11a

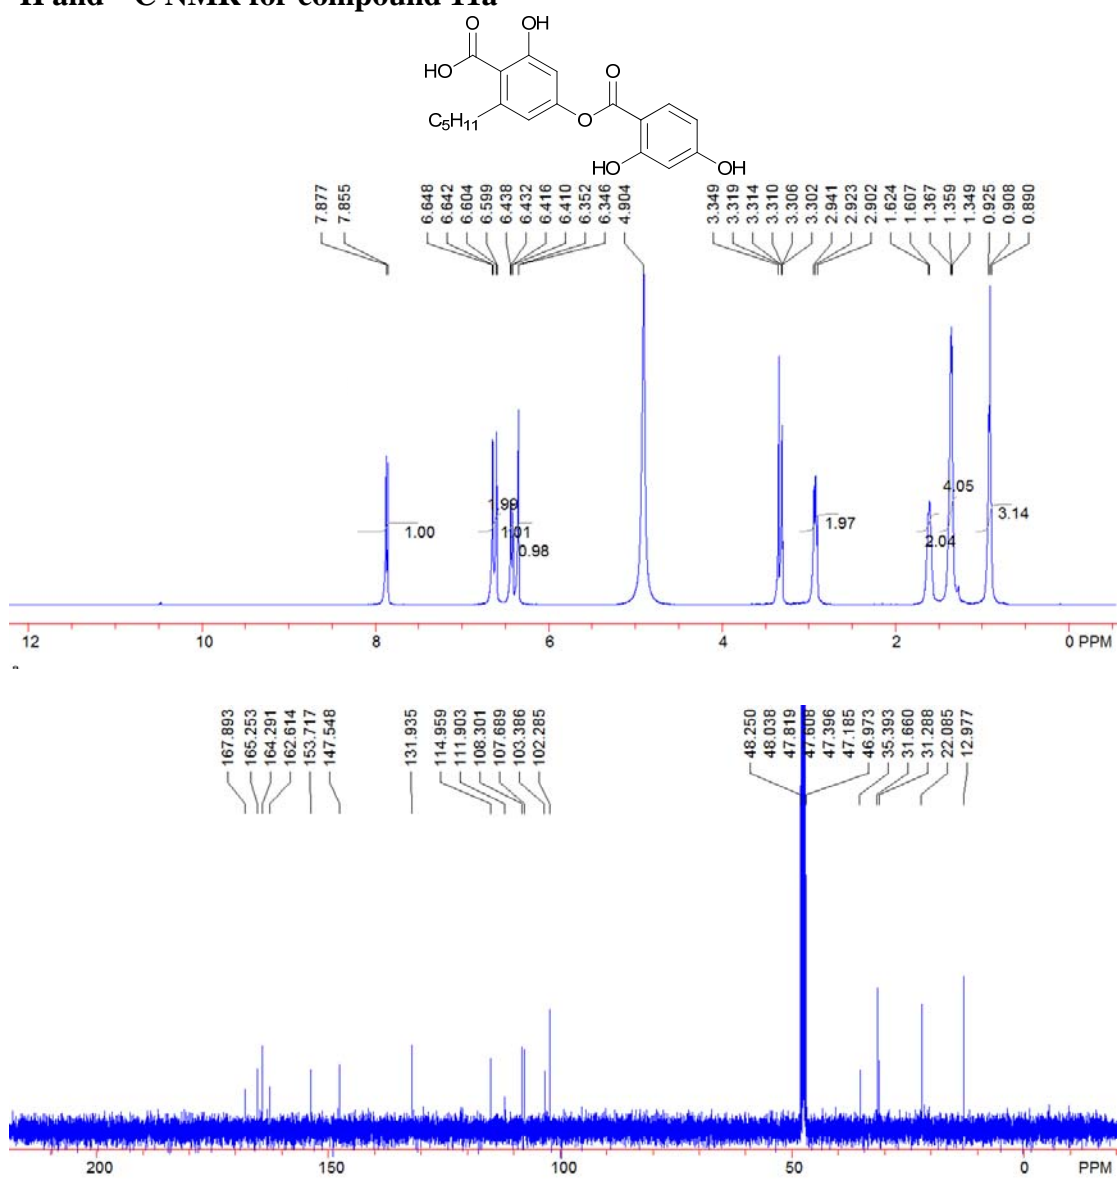

# HPLC for compound 11a

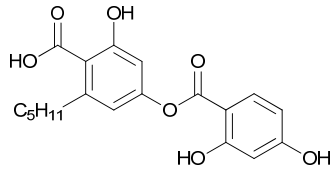

8/17/2013 11:21:41 1 / 1

## ==== Shimadzu LCsolution Analysis Report ====

C:\LabSolutions\LCsolution\Sun\Hao Lin\1-112-1 (MeOH)-redo.lcd  
 Sample Name : 1-112-1 (MeOH)-redo  
 Tray# : 1  
 Vial # : 61  
 Injection Volume : 5 uL  
 Data File Name : 1-112-1 (MeOH)-redo.lcd  
 Method File Name : SDQ gradient.lcm  
 Batch File Name :  
 Data Acquired : 8/17/2013 11:03:58 AM

### <Chromatogram>

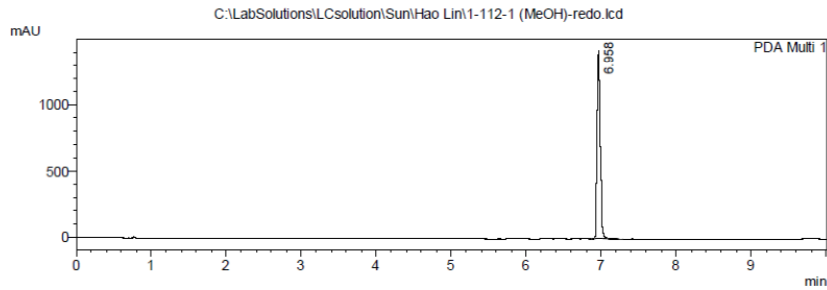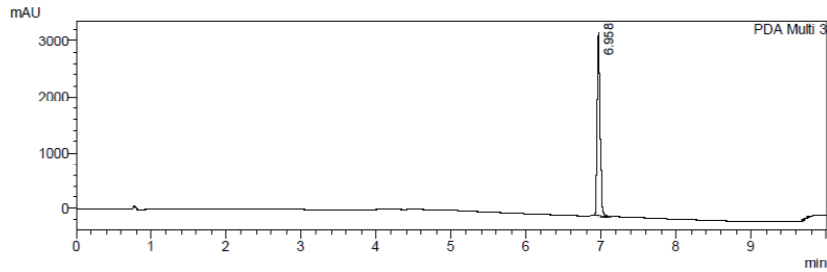

- 1 PDA Multi 1/254nm 4nm
- 2 PDA Multi 3/220nm 4nm

PeakTable

PDA Ch1 254nm 4nm

| Peak# | Ret. Time | Area    | Height  | Area %  | Height % |
|-------|-----------|---------|---------|---------|----------|
| 1     | 6.958     | 3956350 | 1397126 | 100.000 | 100.000  |
| Total |           | 3956350 | 1397126 | 100.000 | 100.000  |

PeakTable

PDA Ch3 220nm 4nm

| Peak# | Ret. Time | Area    | Height  | Area %  | Height % |
|-------|-----------|---------|---------|---------|----------|
| 1     | 6.958     | 8208745 | 3289211 | 100.000 | 100.000  |
| Total |           | 8208745 | 3289211 | 100.000 | 100.000  |

C:\LabSolutions\LCsolution\Sun\Hao Lin\1-112-1 (MeOH)-redo.lcd

$^1\text{H}$  and  $^{13}\text{C}$  NMR for compound 11b

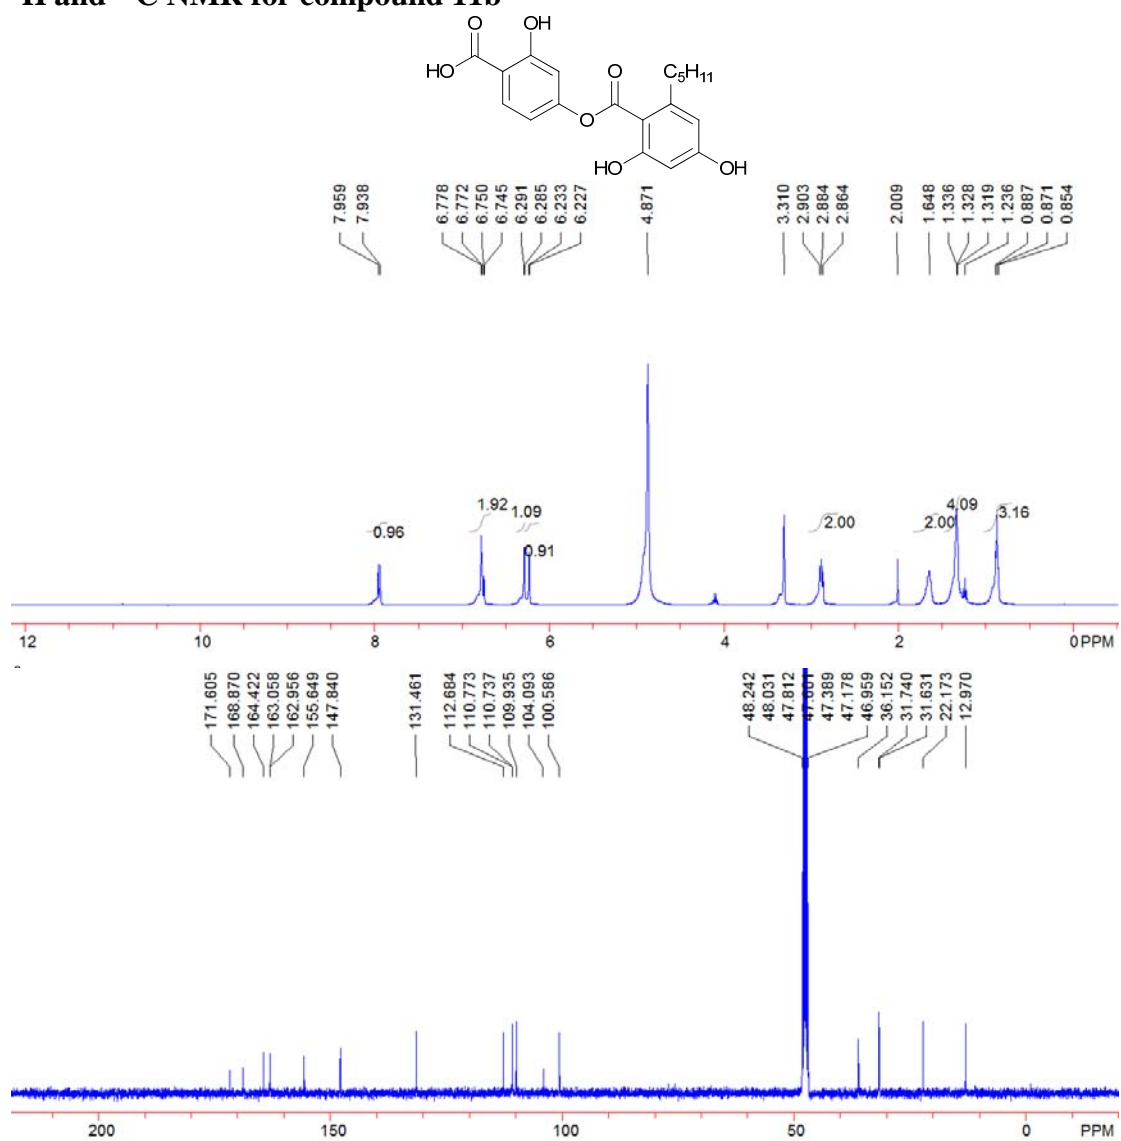

# HPLC for compound 11b

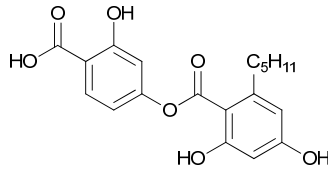

8/17/2013 11:28:10 1 / 1

## ==== Shimadzu LCsolution Analysis Report ====

C:\LabSolutions\LCsolution\Sun\Hao Lin\1-110-1 (MeOH).lcd  
 Sample Name : 1-110-1 (MeOH)  
 Tray# : 1  
 Vial # : 61  
 Injection Volume : 5 uL  
 Data File Name : 1-110-1 (MeOH).lcd  
 Method File Name : SDQ gradient.lcm  
 Batch File Name :  
 Data Acquired : 8/17/2013 11:15:07 AM

### <Chromatogram>

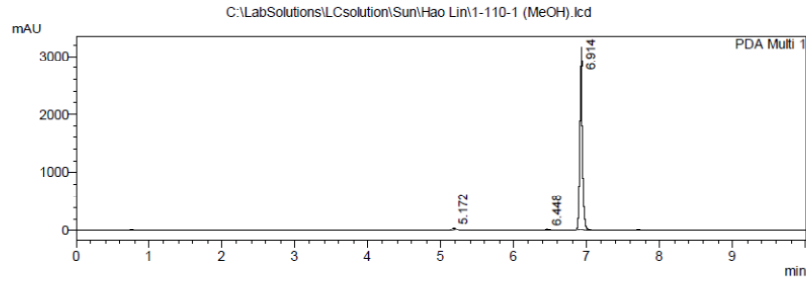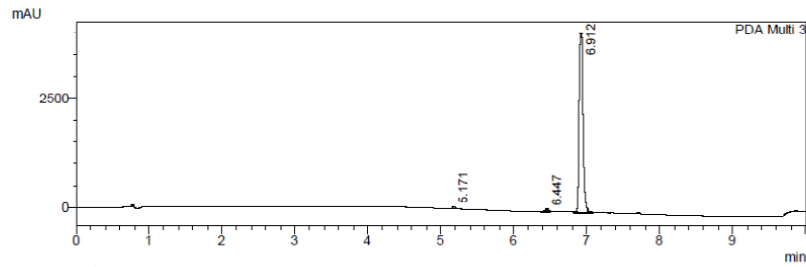

- 1 PDA Multi 1/254nm 4nm
- 2 PDA Multi 3/220nm 4nm

PeakTable

| Peak#        | Ret. Time | Area           | Height         | Area %         | Height %       |
|--------------|-----------|----------------|----------------|----------------|----------------|
| 1            | 5.172     | 100009         | 38898          | 1.222          | 1.242          |
| 2            | 6.448     | 62732          | 23520          | 0.766          | 0.751          |
| 3            | 6.914     | 8022517        | 3068991        | 98.012         | 98.007         |
| <b>Total</b> |           | <b>8185258</b> | <b>3131409</b> | <b>100.000</b> | <b>100.000</b> |

PeakTable

| Peak#        | Ret. Time | Area            | Height         | Area %         | Height %       |
|--------------|-----------|-----------------|----------------|----------------|----------------|
| 1            | 5.171     | 128001          | 44342          | 0.796          | 1.056          |
| 2            | 6.447     | 137690          | 54314          | 0.856          | 1.293          |
| 3            | 6.912     | 15817861        | 4100444        | 98.348         | 97.651         |
| <b>Total</b> |           | <b>16083553</b> | <b>4199101</b> | <b>100.000</b> | <b>100.000</b> |

C:\LabSolutions\LCsolution\Sun\Hao Lin\1-110-1 (MeOH).lcd

# $^1\text{H}$ and $^{13}\text{C}$ NMR for compound 11c

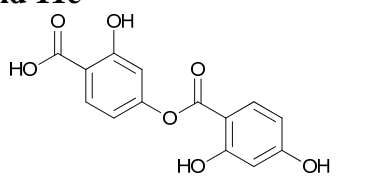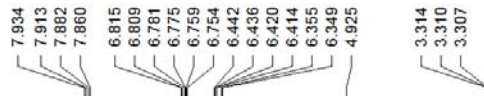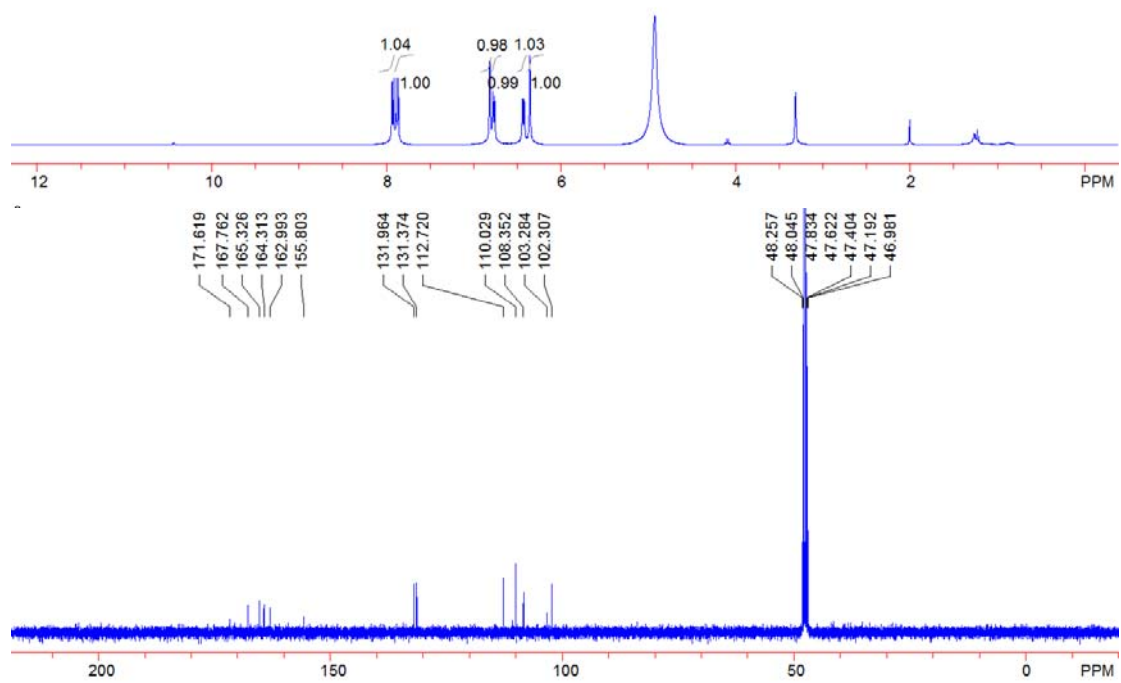



# HPLC for compound 11c

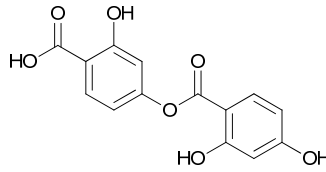

5/2/2013 16:17:38 1 / 1

## ==== Shimadzu LCsolution Analysis Report ====

Sample Name : 1-116-1  
 Tray# : 1  
 Vial # : 61  
 Injection Volume : 5 uL  
 Data File Name : 1-116-1.lcd  
 Method File Name : SDQ gradient.lcm  
 Batch File Name :  
 Data Acquired : 5/2/2013 3:51:06 PM

### <Chromatogram>

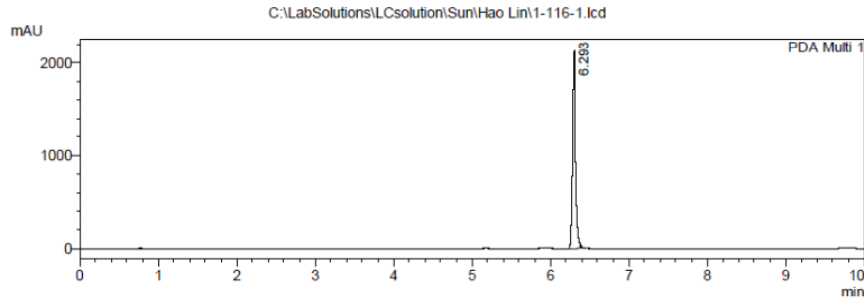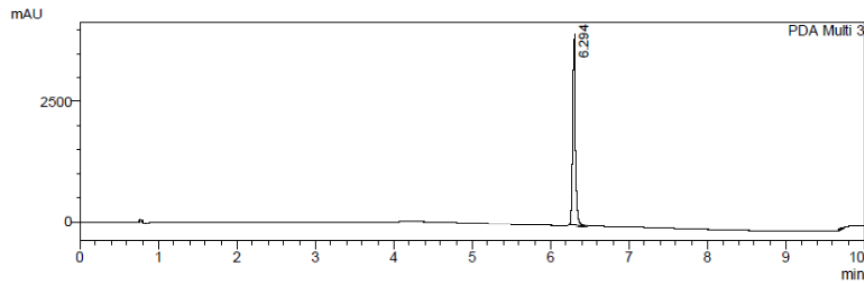

- 1 PDA Multi 1/254nm 4nm
- 2 PDA Multi 3/220nm 4nm

PeakTable

| Peak# | Ret. Time | Area    | Height  | Area %  | Height % |
|-------|-----------|---------|---------|---------|----------|
| 1     | 6.293     | 5581186 | 2124937 | 100.000 | 100.000  |
| Total |           | 5581186 | 2124937 | 100.000 | 100.000  |

PeakTable

| Peak# | Ret. Time | Area    | Height  | Area %  | Height % |
|-------|-----------|---------|---------|---------|----------|
| 1     | 6.294     | 9916102 | 4024125 | 100.000 | 100.000  |
| Total |           | 9916102 | 4024125 | 100.000 | 100.000  |

C:\LabSolutions\LCsolution\Sun\Hao Lin\1-116-1.lcd

# $^1\text{H}$ and $^{13}\text{C}$ NMR for compound 11d

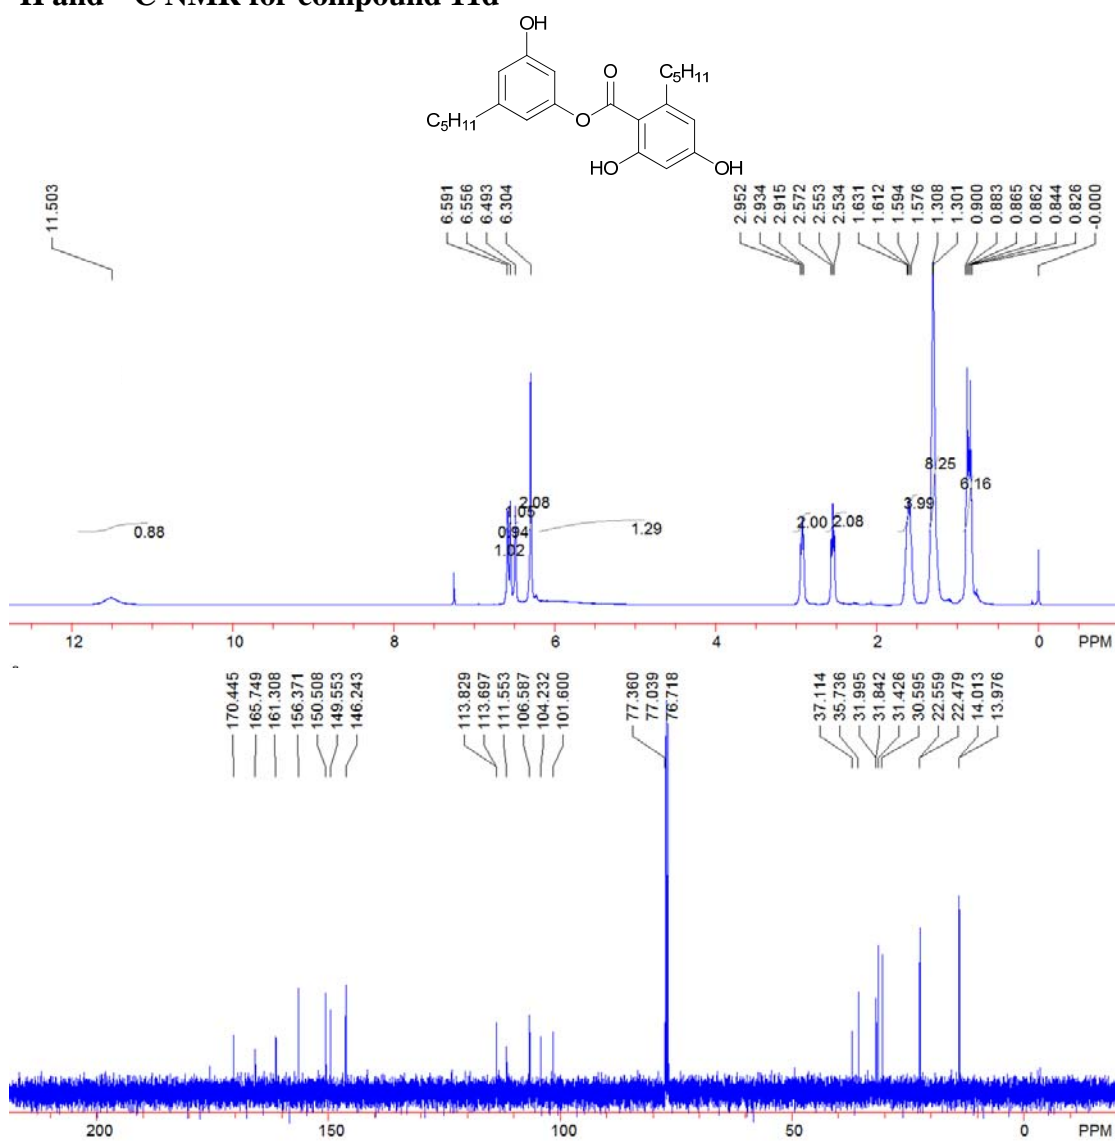

# HPLC for compound 11d

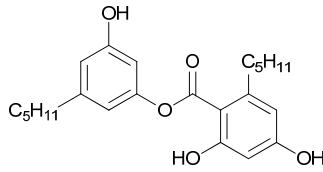

4/9/2013 10:05:15 1 / 1

## ==== Shimadzu LCsolution Analysis Report ====

Sample Name : 1-96-1  
 Tray# : 1  
 Vial # : 61  
 Injection Volume : 5 uL  
 Data File Name : 1-96-1.lcd  
 Method File Name : SDQ gradient.lcm  
 Batch File Name :  
 Data Acquired : 4/9/2013 9:47:43 AM

### <Chromatogram>

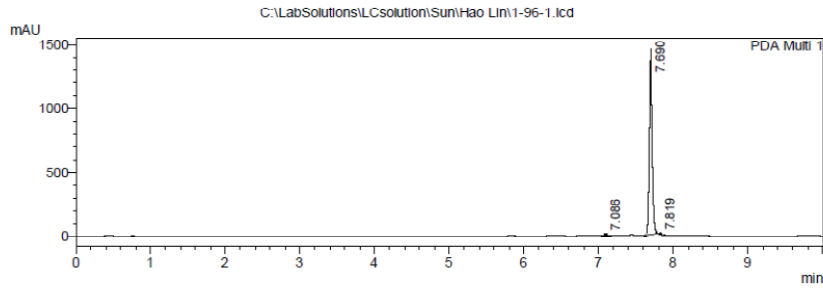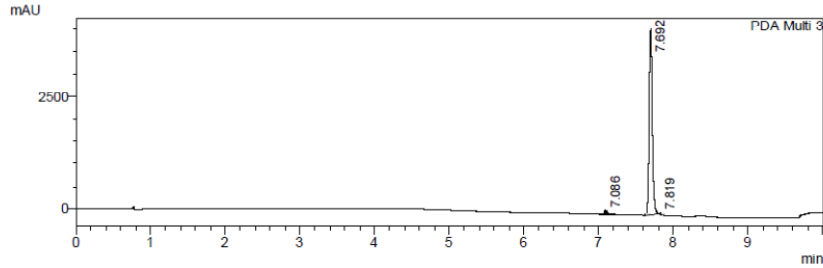

- 1 PDA Multi 1/254nm 4nm
- 2 PDA Multi 3/220nm 4nm

Peak Table

PDA Ch1 254nm 4nm

| Peak# | Ret. Time | Area    | Height  | Area %  | Height % |
|-------|-----------|---------|---------|---------|----------|
| 1     | 7.086     | 36707   | 13428   | 0.908   | 0.927    |
| 2     | 7.690     | 3998405 | 1430289 | 98.944  | 98.777   |
| 3     | 7.819     | 5978    | 4276    | 0.148   | 0.295    |
| Total |           | 4041090 | 1447992 | 100.000 | 100.000  |

PeakTable

PDA Ch3 220nm 4nm

| Peak# | Ret. Time | Area     | Height  | Area %  | Height % |
|-------|-----------|----------|---------|---------|----------|
| 1     | 7.086     | 181897   | 70014   | 1.385   | 1.666    |
| 2     | 7.692     | 12938391 | 4121137 | 98.530  | 98.087   |
| 3     | 7.819     | 11138    | 10343   | 0.085   | 0.246    |
| Total |           | 13131426 | 4201494 | 100.000 | 100.000  |

C:\LabSolutions\LCsolution\Sun\Hao Lin\1-96-1.lcd

# $^1\text{H}$ and $^{13}\text{C}$ NMR for compound 14

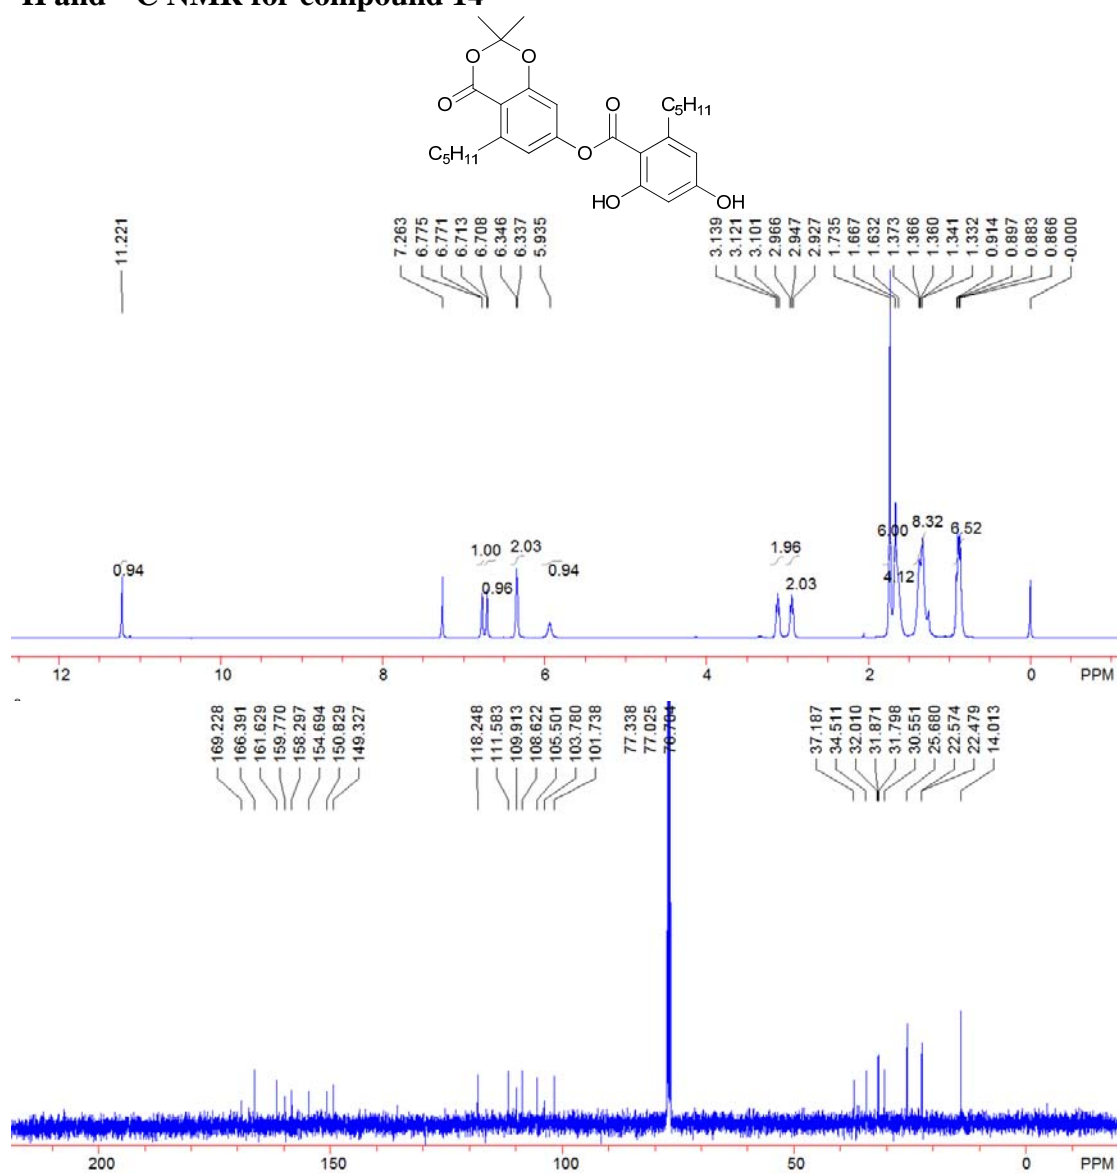

# HPLC for compound 14

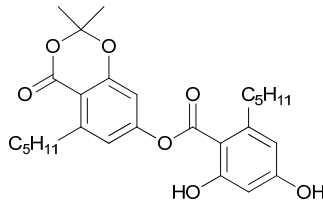

5/3/2013 10:43:06 1 / 1

## ==== Shimadzu LCsolution Analysis Report ====

Sample Name : 1-114-1  
 Tray# : 1  
 Vial # : 61  
 Injection Volume : 10 uL  
 Data File Name : 1-114-1.lcd  
 Method File Name : SDQ gradient.lcm  
 Batch File Name :  
 Data Acquired : 4/28/2013 10:16:42 AM

### <Chromatogram>

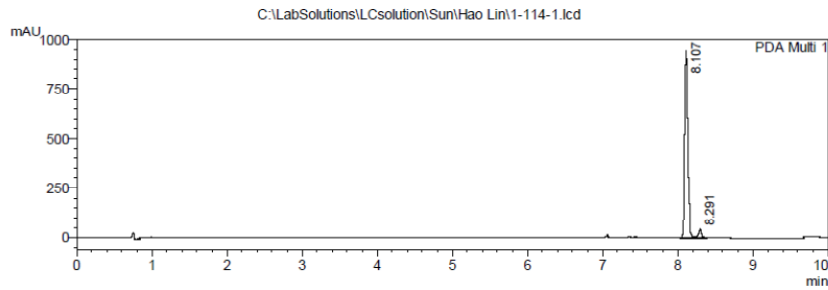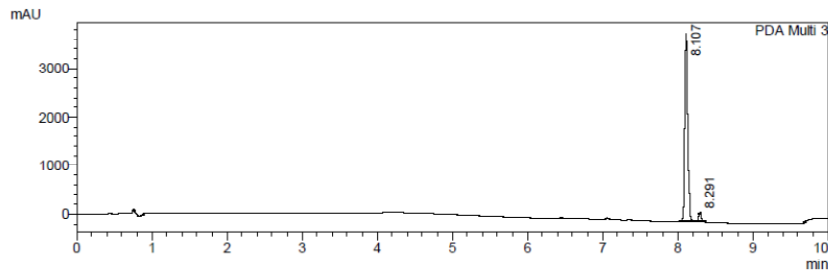

- 1 PDA Multi 1/254nm 4nm
- 2 PDA Multi 3/220nm 4nm

PeakTable

| Peak# | Ret. Time | Area    | Height | Area %  | Height % |
|-------|-----------|---------|--------|---------|----------|
| 1     | 8.107     | 2667742 | 937828 | 95.907  | 95.855   |
| 2     | 8.291     | 113819  | 40555  | 4.093   | 4.145    |
| Total |           | 2781061 | 978383 | 100.000 | 100.000  |

PeakTable

| Peak# | Ret. Time | Area     | Height  | Area %  | Height % |
|-------|-----------|----------|---------|---------|----------|
| 1     | 8.107     | 10064157 | 3868953 | 95.654  | 95.742   |
| 2     | 8.291     | 457214   | 172085  | 4.346   | 4.258    |
| Total |           | 10521371 | 4041038 | 100.000 | 100.000  |

C:\LabSolutions\LCsolution\Sun\Hao Lin\1-114-1.lcd
